1 **Highly efficient CRISPR-mediated homologous recombination via**  
2 **NHEJ deficiency rather than HDR factors overexpression in *Populus***  
3

4 Ali Movahedi<sup>1§\*</sup>, Hui Wei<sup>1§</sup>, Zhong-Hua Chen<sup>2</sup>, Weibo Sun<sup>1</sup>, Jiaxin Zhang<sup>3</sup>, Dawei Li<sup>1</sup>, Liming  
5 Yang<sup>1\*</sup>, and Qiang Zhuge<sup>1\*</sup>  
6

7 <sup>1</sup> College of Biology and the Environment, Co-Innovation Center for Sustainable Forestry in  
8 Southern China, Key Laboratory of Forest Genetics & Biotechnology, Ministry of Education,  
9 Nanjing Forestry University, Nanjing 210037, China

10 <sup>2</sup> School of Science, Hawkesbury Institute for the Environment, Western Sydney University,  
11 Penrith, NSW 2751, Australia

12 <sup>3</sup> School of Food Science and Pharmaceutical Engineering, Nanjing Normal University, Nanjing  
13 210046, China  
14  
15

16 \*Correspondence should be addressed to Qiang Zhuge, Ali Movahedi, and Liming Yang: College  
17 of Biology and the Environment, Co-Innovation Center for Sustainable Forestry in Southern  
18 China, Key Laboratory of Forest Genetics & Biotechnology, Ministry of Education, Nanjing  
19 Forestry University, Nanjing 210037, China. E-mail: qzhuge@njfu.edu.cn;  
20 ali\_movahedi@njfu.edu.cn; yangliming@njfu.edu.cn; Fax: +86 25 85428701  
21

22 § These authors are equally as the first author  
23  
24

25 **Running title: Highly efficient homologous recombination via *XRCC4* deficiency in poplar**  
26  
27  
28  
29  
30  
31  
32  
33  
34  
35  
36  
37  
38  
39

40 **Abstract**

- 41 • Efficient homology-directed DNA repair (HDR) is a vital difficulty confronting researchers to  
42 replace the target genome's desired fragment. In plants, scientists have performed meticulous  
43 investigations on herbal, crops, and citrus trees using HDR effector proteins, CtIP and MRE11,  
44 to obtain double-stranded breaks (DSBs) more precisely. Although HDR efficiency in plants  
45 previously has been reported, no record has been declared about HDR efficiency in woody  
46 perennial *Populus*.
- 47 • Here, we hypothesized that inhibition of non-homologous recombination cofactors XRCC4 and  
48 enhancing the HDR pathway activities enable us to improve the HDR efficiency. In this study,  
49 the *BleoR* gene was used to integrate into the interested site and generated transformants  
50 against Zeocin antibiotics. We designed plasmids, including different fusions of HDR proteins  
51 and, together with the *XRCC4* target. Furthermore, we showed that TaqMan real-time PCR  
52 could be a powerful tool to verify HDR efficiency
- 53 • We confirmed that both applying HDR proteins and *XRCC4* deficiency simultaneously could  
54 improve HDR efficiency, which showed about fiftyfold more, and decremented  
55 polymorphisms about sixfold less than no affecting HDR and NHEJ pathways. We developed a  
56 new recombinant poplar genome to generate stable lines resistant to the Zeocin antibiotic.

57

58 **Keywords:** CRISPR; XRCC4; Homologous recombination; BleoR; *Populus trichocarpa*

59

60

61

62

63

64

65

66

67

## 68 Introduction

69 The clustered regularly interspaced short palindromic repeat (CRISPR)/CRISPR-associated  
70 (Cas) protein system has been widely developed for DNA sequence manipulation in recent  
71 years. The efficient molecular scissors of the Cas9 system generate double-strand breaks (DSB),  
72 which consequently initiates endogenous repair machinery typically via either the error-prone  
73 non-homologous end joining (NHEJ) pathway or the donor-dependent homology-directed  
74 repair (HDR) pathway (Symington and Gautier, 2011). NHEJ repair can randomly lead to small  
75 deletions or insertions (indels) at the DSB area, which then shifts the reading frame, interferes  
76 with the gene function, and has shown a predominant pathway and occurs among the cell cycle  
77 widely (Panier and Boulton, 2014). The HDR is rare but powerful for sequence insertion and  
78 replacement if a homologous DNA substrate is available (Puchta, 2005). Up to date, many  
79 studies have been carried out to improve the genetic modification of crops by HDR. For  
80 instance, one study has been carried out to increase *ARGOS8* expression by replacing the *GOS2*  
81 promoter via HDR to drive *ARGOS8* expression (Shi et al., 2017). Another report showed an  
82 enhancement in the efficiency of the insertion of the 35S promoter in upstream of  
83 the *ANT1* gene in tomato (Cermak et al., 2015). Many publications also report the successful  
84 generation of null mutations in woody species via the NHEJ pathway since the first  
85 implementation in poplar (Bewg et al., 2018; Zhou et al., 2015). However, precise gene  
86 targeting and replacement were only reported in model plants such as *Arabidopsis* (Schiml et al.,  
87 2014) and rice (Li et al., 2016). Still, no report shows highly efficient HDR happened in woody  
88 perennials.

89 Many attempts have been made to improve gene targeting efficacy and accuracy (Liu et  
90 al., 2019). Lu et al. (2020) recently used chemically modified donor DNA to promote heritable  
91 sequence insertion and replacement via NHEJ and HDR repair pathways. Both-end  
92 phosphorothioate-linkage and 5'-phosphorylation modification facilitated NHEJ insertion with  
93 lengths up to 2,049bp. Furthermore, a tandem repeat-HDRs system was optimized for base  
94 substitutions and in-locus tags (Lu, Tian et al., 2020). Though another biotechnology  
95 breakthrough on prime editor presented the success bases of insertion in rice (Lin et al., 2020;  
96 Tang et al., 2020), HDR-mediated precise gene targeting is a promising method for a long time.

97 Manipulation of the DSB repair pathway to improve HDR frequency is the most common  
98 method to enhance precise gene knock-in. One of the main difficulties in HDR efficiency is the  
99 limited delivery of donor DNA templates (DDTs) into the cell nucleus. Previous data indicated  
100 that it is necessary to increase the number of cells containing DDTs at S/G2 cell division phases  
101 to increase HDR efficiency (Yang et al., 2016). Several traditional strategies were applied to  
102 enrich the DDTs availability, such as offering sufficient DDTs via the particle bombardment  
103 replicons (Gil-Humanes et al., 2017; Wang et al., 2017), protoplasts (Svitashev et al., 2016), the  
104 geminiviral-based replication (Butler et al., 2016; Dahan-Meir et al., 2018; van Vu et al., 2020;  
105 Wang et al., 2017), and RNA transcription (Li et al., 2019b), but this still is one of the significant  
106 problems across woody plants genome. In this case and regarding the high and reliable stability  
107 of genes transmitted by *Agrobacterium* and widely use to transduce genes into woody plant  
108 cells (Movahedi et al., 2014; Movahedi et al., 2015), there few reports on enhancing the  
109 *Agrobacteria* method delivery to increase the efficiency of transferring DDT and, consequently,  
110 the recovery of DSBs as HDR in woody trees (Ali et al., 2020; An et al., 2020). Above all,  
111 manipulating the effectors involved in either NHEJ or HDR pathway was more straightforward.  
112 The positive effects of recombinant homologous factors and their impact on enhancing HDR  
113 efficiency in mammals have already been reported. Cas9 integrates with MRE11, CtIP, and  
114 Rad51, Rad52, and promotes significant HDR efficiency in human cells and decreases NHEJ  
115 significantly, with at least a 2-fold increase in HDR and a 6-fold increase in HDR/NHEJ ratio (Tran  
116 et al., 2019). On the other hand, inhibition of DNA ligase IV (LIG4), Ku 70, and Ku 80, which are  
117 outwardly involved only in NHEJ and known as the most critical NHEJ factors, protect DSB from  
118 discrediting by forming one heterodimeric complex to bind tightly and load additional repair  
119 proteins such as DNA ligase IV (Friesner and Britt, 2003; Grawunder et al., 1998a; Maruyama et  
120 al., 2015; Pierce et al., 2001; Tran et al., 2019) and increase the HDR efficiency up to 19-fold  
121 (Tran et al., 2019). In *Arabidopsis*, mutated *Ku70* or *Lig4* enhanced the HDR-based genome  
122 targeting to 5~16-fold or 3~4-fold respectively (Qi et al., 2013).

123 XRCC4 is another critical NHEJ factor that has not yet been considered for its  
124 interference effect on HDR efficiency. XRCC4 is one cofactor of LIG4 to interact with KU 70 and  
125 KU 80 and ligate the DSB (Grawunder et al., 1998b). To date, there is no report on combining

126 HDR factors overexpressing, specially CtIP and MRE11, and NHEJ factors suppression, specially  
127 XRCC4, to promote the HDR pathway in woody plants. Programmable endonucleases affect  
128 DSBs at target positions in genomic DNA and create undesired breaks outside of on-target  
129 positions and create off-target mutations. Cleavage at off-target sites direct to chromosomal  
130 rearrangements, including translocations, insertions, and deletions, which happen in the  
131 interruption of regular gene expression and the activation of oncogenes (Li et al., 2019a). Today,  
132 scientists have realized that reducing off-target may allow efficient and accurate genome  
133 editing (Wu and Yin, 2019). For this why, the effect of off-targets on efficient, precise genome  
134 editing and ways to reduce their impacts has already been studied (Hajiahmadi et al., 2019; Li  
135 et al., 2019a; Wu and Yin, 2019).

136 In eukaryotic kingdoms, Mitogen-activated protein kinase (MAPK or MPK) signaling is  
137 broadly crossed. In plants, they may direct signal pathways to resist the impacts of drought,  
138 cold, salt, scratch, and mechanical damage(Chen et al., 2020). Moreover, scientists have shown  
139 that MAPKs direct cellular responses against heat shock, osmotic, and other environmental  
140 stresses (Mohanta et al., 2015). Sun et al. (2015) investigated and comprised the *MAPK* genes  
141 from Maize (*Zea mays*), poplar (*Populus trichocarpa*), Arabidopsis (*Arabidopsis thaliana*),  
142 tomato (*Solanum lycopersicum*), and rice (*Oryza sativa*) to show the similarity of motifs,  
143 genomic structures, and domains. These authors also proved that *MAPK* genes are  
144 preferentially expressed in reproductive tissues and organs besides their roles against abiotic  
145 stress and ABA signaling. In Arabidopsis, *MAPKK2* (*MKK2*) are transcriptional regulator genes  
146 stimulated by environmental stresses such as salinity and cold to promote plant protection  
147 (Teige et al., 2004). To date, and regarding the importance of the MAPK pathway, there is no  
148 report on applying CRISPR genome editing through all involved genes to enhance its impact in  
149 the mentioned above roles.

150 Here, we aimed to develop the CRISPR/Cas9-mediated knock-in system in poplar with a  
151 haploid chromosome of 19 via NHEJ cofactor (XRCC4) suppression and HDR effectors (MRE11  
152 and CtIP) overexpression. Also, we used the optimized homologous arms 400 bp to enhance the  
153 HDR activities, and the concentration of DDT fragments to facilitate the DDT delivery. We  
154 selected mitogen-activated protein kinases (MAPKs) as a case study. We also achieved the

155 stable transformant lines resistant against zeocin antibiotic with similar behavior to wild types  
156 against salinity stresses.

## 157 **Materials and Methods**

### 158 **Plant Transformation**

159 We cultivated *P. trichocarpa* seedlings in a phytotron at 23±2°C under a 16/8 light/dark  
160 time (Movahedi et al., 2015). To generate transgenic lines, we used stems from four weeks old  
161 young clones and dipped them in the optimized of *Agrobacterium tumefaciens* stimulant and  
162 pathogenic suspension (OD<sub>600</sub>: 2.5, 120 min, pH ~5, Acetosyringone (As): 200 µM) (Movahedi et  
163 al., 2014) for 5 min with gentle shaking and then transferred to the semi-solid woody plant  
164 medium (WPM) added with 0.05 mg/L Indole-3-butyric acid (IBA), 0.006 mg/L thidiazuron (TDZ),  
165 200 µM As and 0.5% (w/v) agar. Afterward, the stimulated stems were incubated in the dark at  
166 23°C for two days. The assumed transformants were then co-cultivated in selection media  
167 enriched with 0.1 mg/L IBA, 0.006 mg/L TDZ, 100 mg/L cefotaxime, 8 mg/L hygromycin, 50 mg/L  
168 Zeocin and 0.8% (w/v) agar. Two weeks later, buds were regenerated and then sub-cultured  
169 independently in media including 0.1 mg/L IBA, 0.001 mg/L TDZ, 100 mg/L cefotaxime, 8 mg/L  
170 hygromycin, 50 mg/L Zeocin and 0.8% (w/v) agar. After six weeks, buds with four to six small  
171 leaves were transferred to the MS media with 0.1 mg/L IBA, 200 mg/L cefotaxime, 70 mg/L  
172 Zeocin, and 0.8% (w/v) agar to root. Five lines were used for each experiment independently,  
173 and each line included about ten individuals.

### 174 **Targets and protein detection**

175 We decided to target the *MKK2* gene from *P. trichocarpa* (POPTR\_0018s05420g;  
176 Chromosome 18) because of its vital role in transcriptional regulation against environmental  
177 stresses. Therefore, we used Uniprot (<https://www.uniprot.org/>) to download MKK2 protein  
178 and then used the BLAST database of the National Center for Biotechnology Information (NCBI)  
179 (<https://blast.ncbi.nlm.nih.gov/>) to download full DNA sequences and CDS. To detect targets,  
180 we used Geneious Prime® 2020.1.1 to analyze *MKK2* locus and detect targets compared to the  
181 whole genome of *P. trichocarpa*, which has been already downloaded from NCBI  
182 (Supplementary Table 1) (Doench et al., 2014; Hsu et al., 2013). Geneious Prime® also has been  
183 used to analyze the *XRCC4* (POPTR\_0010s08650g, Chromosome 10) gene for knocking out. The

184 PAM motif target sequences were concerned with the exon 8 area from the *MKK2* and exon 1  
185 area from the *XRCC4* genes. Furthermore, and to evaluate the effect of HDR proteins and also  
186 proper function of edited *MKK2* gene in transformants, we used Uniprot to use CtIP  
187 (POPTR\_001G269700v3), MRE11 (POPTR\_0001s41800g), BRCA1 (POPTR\_0005s26150g), Rad50  
188 (POPTR\_0001s32760g), Rad51 (POPTR\_0014s06360g), Lig4 (POPTR\_0018s13870g).

### 189 ***MKK2* locus target oligo synthesis**

190 We designed a pair of oligos (Supplementary Table 2; *MKK2* Oligo-F and -R) flanked  
191 by *BsaI* adaptors. Synthesized oligos were then ligated into digested pRGEB31 vectors by *BsaI*  
192 restriction enzyme (Xie and Yang, 2013) to construct pgRNA (Supplementary 1a). Afterward, we  
193 transferred all vectors into *E. coli* (DH5 $\alpha$ ) and propagated under normal conditions. Vectors  
194 were then extracted using the plasmid midi kit (Qiagen, USA) and confirmed by sanger  
195 sequencing (GenScript, Nanjing).

### 196 **Construction of DDT and pDDT**

197 To produce DDT (Supplementary1b), we designed five fragments, constructed and  
198 ligated them, respectively (Supplementary2a). To construct fragment one, the OsU3 promoter  
199 and gRNA scaffold were isolated from pRGEB31 (Supplementary Table 2, OS1-F and -R) flanked  
200 by *HindIII* and *BamHI* endonucleases. To increase the amount of DDT in the cell nucleus and  
201 improve HDR efficiency, we decided to use the cleavage property of Cas9 with designing two  
202 special gRNA targets 1 and -2 (No on- and -off-targets through whole poplar genome) besides  
203 DDT (Zhang et al., 2017) (Supplementary 1b). Thus, we designed special gRNA oligos (Sgo1-F  
204 and -R) (Supplementary 2a; Supplementary Table 2, special gRNA oligo1-F and -R) as the  
205 described details (Xie and Yang, 2013) to form special gRNA target1 (Sgt1) and to ligate into the  
206 fragment one. To construct fragment two, we isolated 5' homology arm (400 bp) sequences  
207 from *P. trichocarpa* genomic DNA (Supplementary Table 2, 5' Ho-F-1 and -R-1). Afterward,  
208 regular PCR was carried out using primers with the extensions of *BamHI*-special target1 (St1)  
209 and 39 bp from complemented 5' of fragment 3 (Supplementary Table 2, 5' Ho-F-2 and -R-2)  
210 (Supplementary 2a) to achieve component two.

211 To construct fragment three, we isolated the BleoR CDS from the PCR<sup>®</sup>-XL-Topo<sup>®</sup> vector  
212 (Supplementary Table 2, BleoR-1092F and -2276R). Then, the overlap-PCR was performed

213 (Supplementary Table 2, BP1,2,3-F and -R) using isolated BleoR CDS as the template to add the  
214 remained sequences from exon 8 and exon 9 to the 5' region of BleoR CDS and also 6XHis and  
215 PolyA tail to the 3' area of BleoR CDS (Supplementary 2a). We isolated a 3' homology arm (400  
216 bp) (Supplementary Table 2, 3' Ho-F-1 and -R-1) from *P. trichocarpa* genomic DNA to assemble  
217 fragment four. Then, we performed PCR to extend 3' homology arm with 30 bp Poly-T and *Nco*-  
218 special target2 (St2) sequences (Supplementary Table 2, Ho-F-2 and -R-2) (Supplementary 2a).  
219 Finally, we performed standard PCR to isolate the OsU3 promoter and gRNA scaffold from  
220 pRGEB31 (Supplementary Table 2, Os2-F and Os2-R). Moreover, we designed special gRNA  
221 oligos (Sgo2-F and -R) (Supplementary 2a; Supplementary Table 2, special gRNA oligo2-F and -R)  
222 again as the described details (Xie and Yang, 2013) to form special gRNA target2 (Sgt2) and to  
223 ligate into the fragment five.

224 To construct pDDT, we ligated fragments three and two using PCR (Supplementary 2b).  
225 For this, we designed a 39 bp overhang on fragment two that was complementary to the end of  
226 fragment three to form preliminary DDT (Supplementary 2b). In this PCR, we prepared a PCR  
227 reaction with 500 ng of each component. We used everything in PCR reaction except primers  
228 and then denatured fragments at 95 degrees for 5 minutes and allowed two annealing and  
229 extension cycles. We allowed PCR products to anneal at 68 degrees to avoid nonspecific  
230 hybridization amongst the long PCR products for 30 seconds and then extend for one minute at  
231 74 degrees to have a double-stranded outcome. Then we added the primers to the distal ends  
232 of fragments two and three and performed one standard PCR. We purified PCR products and  
233 ligated them into the pEASY vector to sequence and confirm. Then we ligated the preliminary  
234 DDT product to fragment four as described before and formed secondary DDT products  
235 (Supplementary 2b). After sequencing and confirmation, we used the restriction cloning  
236 technique to ligate secondary DDT products to fragments one and four (Supplementary 2b) to  
237 achieve DDT products. Briefly, we incubated a reaction including 50 ng of each digested  
238 fragments, 10x T4 DNA ligase buffer 0.5 ul, T4 DNA ligase (NEB) 1 ul, and H<sub>2</sub>O to 5 ul at 25  
239 degrees for 4 hours and transferred into *E. Coli* DH5 $\alpha$  competent cells for sequencing and  
240 confirmation. Subsequently, we used the restriction cloning technique to merge the DDT  
241 product and pRGEB31 vector and form the pDDT vector (Supplementary 2b).



## 242 **Synthesis of pgCtIP and pgMR**

243 To design a fused CtIP and Cas9 cassette, we isolated the CaMV35S promoter, 3xFLAG,  
244 and Cas9 CDS from pRGEB31 (Supplementary 3a) using designed primers (Supplementary Table  
245 2). In the next step, we obtained CtIP CDS using RT-PCR from the *Populus trichocarpa* genome  
246 (Supplementary 3a; Supplementary Table 2, CtIP-F and -R). The 3'UTR and PolyA fragments  
247 were isolated from the pCAG-T3-hCAS-pA plasmid (Supplementary 3a; Supplementary Table 2,  
248 PolyA-F and -R). To complete pgCtIP, we ligated CaMV35S and 3xFLAG fragments using  
249 restriction cloning and formed backbone 1 (Supplementary 4a). The isolated Cas9 and the  
250 obtained CtIP CDS were also ligated, applying restriction cloning to form the backbone 2  
251 (Supplementary 4a). The backbones 1 and 2 were then ligated using *HindIII* restriction cloning  
252 to form backbone 3 (Supplementary 4a). In the next step, the resulted backbone 3 was ligated  
253 to the assembled 3'UTR-PolyA using *StuI* restriction cloning to form the CtIP cassette  
254 (Supplementary 4a; Supplementary 5a). We used *SdaI* and *PmeI* restriction enzymes to restrict  
255 the cloning of the CtIP cassette and pRGEB31 and achieve the pgCtIP plasmid (Supplementary  
256 4a; Supplementary 5a).

257 To construct a fusion of MRE11 and Cas9, we isolated CaMV35 promoter, 3xFLAG, Cas9,  
258 3'UTR, and PolyA as same the previous steps (Supplementary 3b; Supplementary Table 2). The  
259 MRE11 CDS was obtained recruiting extracted total RNA from *Populus trichocarpa* genome and  
260 RT-PCR as mentioned above (Supplementary 3b; Supplementary Table 2, MRE-F and R). To  
261 complete pgMR, we ligated the isolated CaMV35S and 3xFLAG fragments concerning *XhoI*  
262 endonuclease to form backbone 1 (Supplementary 4b). On the other hand, we constructed  
263 backbone 2 using the isolated Cas9 and 3'UTR-PolyA fragments (Supplementary 4b). The  
264 backbone 1, backbone 2, and MRE11 CDS product were then merged concerning *NotI* and *NdeI*  
265 restriction cloning to form MR cassette (Supplementary 4b; Supplementary 5b). Afterward, we  
266 used restriction cloning with *SdaI* and *PmeI* to construct pgMR plasmid (Supplementary 4b;  
267 Supplementary 5b).

## 268 **Synthesis of pgCtMR and pggCtMR**

269 To construct the CtMR cassette, we prepared all the required fragments, as mentioned  
270 above (Supplementary 3c). Afterward, we merged the CaMV35S and 3xFLAG components

271 using *XhoI* restriction cloning to form backbone 1 (Supplementary 6a). We then ligated  
272 backbone 1 and the already obtained MRE11 CDS product (Supplementary Table 2, MRE-F and -  
273 R) using *NotI* restriction cloning to form backbone 2 (Supplementary 6a). On the other hand,  
274 the isolated Cas9 and the obtained RT-PCR product CtIP CDS were ligated using *BamHI*  
275 restriction cloning to form backbone 3 (Supplementary 6a). We then used backbone 3 and  
276 isolated 3'UTR-PolyA fragment to form backbone 4 (Supplementary 6a). Eventually, we cloned  
277 backbones 2 and 4 to construct the CtMR cassette (Supplementary 6a; Supplementary 5c) and  
278 thereupon implemented *SdaI* and *PmeI* restriction cloning to ligate CtMR cassettes into  
279 pRGEB31, forming pgCtMR plasmid (Supplementary 6a; Supplementary 5c). To target  
280 the *XRCC4* gene and *MKK2* simultaneously, we designed one cassette, including both *XRCC4*, by  
281 adding one CRISPR site (Located on 5' region of target CDS) to mutate *XRCC4* (Non-off-target  
282 site on whole poplar genome; Activity score: 0.415; Specificity score: 100%) (Doench et al.,  
283 2014; Hsu et al., 2013), and *MKK2* gRNAs. For this purpose, we used primers (Supplementary  
284 Table 2, XR-Cass1-F and -R) to isolate the OsU3 promoter and gRNA scaffold from the pRGEB31  
285 vector and then used *MKK2* designed oligos (Supplementary Table 2, *MKK2* Oligo-F and -R) to  
286 ligate *MKK2* target duplex (Supplementary 3d). Besides, we used primers (Supplementary Table  
287 2; XR-Cass2-F and -R) to isolate the OsU3 promoter and gRNA scaffold again. In this process, we  
288 applied *XRCC4* designed oligos (Supplementary Table 2; *XRCC4*-Oligo1 and -2) to ligate the  
289 *XRCC4* target duplex (Supplementary 3d). The achieved fragments were then cloned using *KasI*  
290 restriction cloning to form *XRCC4*-Cassette (Backbone 1) (Supplementary 6b; Supplementary  
291 5d). Afterward, the *XRCC4*-Cassette was cloned into pRGEB31 using *HindIII* and *SdaI* restriction  
292 cloning to form backbone 2 (Supplementary 6b). Finally, we used *SdaI* and *PmeI* restriction  
293 cloning to clone the CtMR cassette into the backbone 2, forming pggCtMR plasmid  
294 (Supplementary 6b; Supplementary 5d). We performed PCR, cloning into pEASY T3 vector, and  
295 DNA sequencing in all the above processes for confirming the right ligation.

#### 296 **RT-PCR, DNA sequencing, Southern blotting, and Western blotting**

297 Total RNA (100 ng/ml) was extracted from young leaves of five weeks grown buds on  
298 Zeocin with TRIzol. We then carried out reverse transcription using total RNA and oligo-dT  
299 primers to synthesize the first cDNA strand (PrimeScript One-Step RT-PCR Kit Ver.2, Takara

300 Biotechnology, Dalian, China) according to the manufacturer's instructions. Afterward, we  
301 designed two RT-PCR for both investigations of right *MKK2* transcription and right happening  
302 HDR. The first RT-PCR was intended to isolate a 920 bp of *MKK2* CDS (Supplementary Table 2,  
303 RT-F and R), while the forward primer was designed from 5' region of exon 9 (15 bp) and 3'  
304 region of exon 8 (15 bp). This RT-PCR purpose was to show the precise attaching of exon 8 and  
305 9 to direct the transcription of *MKK2* correctly. The second RT-PCR was performed to isolate a  
306 413 bp of recombinant CDS (Supplementary Table 2, RT-F-107 and RT-R-519). The forward  
307 primer was designed from *BleoR*, and the reverse primer was designed from exon 7 of *MKK2*.  
308 The purpose of this RT-PCR was to show the explicit HDR happening through our experiments  
309 via transcription of single mRNA from *MKK2* and *BleoR*.

310 Genomic DNA was extracted from young leaves of five weeks grown buds on Zeocin,  
311 applying the DNeasy Plant Mini Kit (Qiagen, USA). The quality of the extracted genomic DNA  
312 (250–350 ng/μl) was determined by a BioDrop spectrophotometer (UK). To DNA sequencing,  
313 we carried out PCR using designed primers (Supplementary Table 2, *MKK2*-S-7F and *MKK2*-S-  
314 1139R), Easy Taq polymerase (TransGene Biotech), and 50 ng of extracted genomic DNA as a  
315 template. All desired bands were then cut off from gels, purified, and sent to the company for  
316 sequencing (GeneScript, Nanjing), alignment, and analysis (Supplementary 7-11). Southern  
317 blotting was performed to verify the integration of *BleoR* into the poplar genome. 500 ng of  
318 genomic DNA was cleaved with *Bam*HI and *Hind*III at 37 °C for 4 h. The digested DNA was then  
319 used as a PCR template to label a 160 bp probe from integrated *BleoR* CDS into the genomic  
320 DNA (Supplementary Table 2; S-F and -R). In this step, we used the DIG (digoxigenin) reagent,  
321 according to the manufacturer's instruction (catalog number 11745832910; Roche, Basel,  
322 Switzerland). PCR product was then segregated on a 0.8% agarose gel. The separated fragments  
323 were shifted on a Hybond N+ nylon membrane (Amersham Biosciences BV, Eindhoven, The  
324 Netherlands).

325 For extraction of proteins, 150 mg fresh leaves of five weeks grown buds were milled in  
326 500 μl extraction buffer (125 mM Tris, pH 6.8, 4 M Urea, 5% β -mercaptoethanol, 4% w/v SDS).  
327 The centrifuge was then performed at 13,000 rpm for 10 min, and the supernatant was  
328 obtained for gel analysis. The extracted protein was then boiled in loading buffer (24% w/v

329 glycerol, 100 mM Tris, a drop amount of Bromophenol Blue, 4% v/v  $\beta$ -mercaptoethanol, 8%  
330 w/v SDS) for 10 min. The extracted protein was analyzed by SDS-PAGE and conceived using  
331 Coomassie brilliant blue R-250 staining. After that, we carried out western blotting according to  
332 Sambrook et al. (1989) using a rabbit anti-His polyclonal antibody developed in our laboratory  
333 as the primary and peroxidase-conjugated goat antirabbit IgG (Zhongshan Biotechnology, Beijing,  
334 China) as the secondary antibody.

### 335 **TaqMan real-time PCR**

336 To test the effect of designed parameters in all experiments on the proper integration of  
337 exogenous *BleoR* with both homology arms, we decided to run the TaqMan assay applying dye  
338 labels such as FAM and VIC adopting Applied Biosystem real-time PCR (Applied Biosystems,  
339 USA). We used high quality extracted genomic DNA (Refer to the southern blotting) as the  
340 template for running TaqMan real-time PCR. In this assay, two fluorescent FAM and VIC will  
341 attach to the 5' region of the probe, while a non-fluorescent quencher (NFQ) binds to the 3'  
342 region. Thus, we designed primers to probe two 150 bp fragments FAM1 (Supplementary 2,  
343 FAM1-F and -R) and FAM2 (Supplementary 2, FAM2-F and -R). These primers were designed so  
344 that FAM1 was able to probe 114 bp nucleotides from the 5' homology arm and 36 bp from  
345 *BleoR*. Besides, FAM2 could probe 105 bp nucleotides from the 3' homology arm and 45 bp  
346 from the *BleoR* (Supplementary 12). We also designed primers (Supplementary Table2, VIC-F,  
347 and -R) to probe one 106 bp fragment VIC on the *actin* gene as the reference with a stable copy  
348 number (Supplementary 12). All samples were analyzed in quadruplicate.

### 349 **Evaluation of HDR efficiency**

350 To evaluate the HDR efficiency, we decided to calculate and compare the  $\Delta\Delta C_t$  mean of  
351 *BleoR* expression integrated into the poplar genome from all grown buds in five designed  
352 experiments separately. In this step, we used the synthesized cDNA (Point to the RT-PCR  
353 section) and designed primers (Supplementary Table 2, *BleoR*-52F and -151R) to carry out real-  
354 time PCR. We used the Fast Start Universal SYBR Green Master (Rox; No. 04913914001: Roche,  
355 USA) and performed three technical repeats for each event. Then, we used ANOVA-One way to  
356 analyze the achieved mean data and compared.

## 357 **RT-qPCR**

358 We applied RT-qPCR using synthesized cDNA from grown buds on Zeocin (as mentioned  
359 above) as the template and designed primers (Supplementary Table2, RT-qPCR part) to  
360 investigate the expression of *BleoR* and *MKK2* genes and their impact on each other. We also  
361 explored our method's impact to develop HDR efficiency on HDR (CtIP, MRE11, BRCA1, Rad50,  
362 and Rad51) and NHEJ (Lig4, XRCC4) influential factors.

## 363 **Functional analyses and phenotypic properties**

364 Regarding the critical roles of *MKK2* in plant protection against environmental stresses  
365 (Mohanta et al., 2015; Teige et al., 2004), and to confirm the correct HDR happened through  
366 recovered events, we decided to assess the functional analyzes of *MKK2* and phenotypic  
367 properties affected by salt stress and compare with WT. Recovered events were then planted  
368 on soil and transferred to the greenhouse. After two weeks of acclimation, we extracted total  
369 RNA from all transferred recovered events. Then, we irrigated all recovered events daily with 50  
370 mM NaCl for one week. Some plants withered. Therefore, we extracted total RNA from survived  
371 events to perform RT-qPCR with triplicates for each event and analyzed their stem lengths (mm)  
372 and -diameter (mm) before and after salt stress.

## 373 **Statistical analysis**

374 All data were analyzed using ANOVA One-Way with Turkey means comparison  
375 calculated by OriginPro 2018 and Excel 2019 software (Microsoft, Redmond, WA, USA).  
376 Differences were analyzed statistically when the confidence intervals presented no overlap of  
377 the mean values with an error value of 0.05.

## 378 **Results and Discussion**

379 Despite extensive research on using factors included in homology-directed repair  
380 pathway to enhance HDR efficiency in plants (An et al., 2020; Gil-Humanes et al., 2017; Hummel  
381 et al., 2018; Li et al., 2015; Svitashv et al., 2015), no research has been reported using this  
382 system in haploid woody species such as poplar.

## 383 **Strategies for target detection and HDR**

384 The importance of *the MKK2* gene role in plant protection has been shown against salt  
385 (Chen et al., 2020) and low temperature (Gao et al., 2017). In this study, the *MKK2* gene was

386 targeted for integrating *BleoR* into the poplar genome by improving HDR efficiency with Zeocin  
387 resistance (Figure 1a). Guide RNA was designed near the 3' UTR to avoid rendering the gene  
388 expression denoting higher specificity and less off-target (Hsu *et al.*, 2013; Doench *et al.*, 2014).  
389 We targeted a detected CRISPR site located on exon 8 with the highest activity score and no off-  
390 target effects on CDS throughout the whole *P. trichocarpa* genome (Figure 1a and  
391 Supplementary Table 1). Afterthought and regarding (Song and Stieger, 2017), we optimized  
392 the lengths of homologous arms (data not shown) to apply 400 bp upstream and downstream  
393 of the PAM site as the 5' and 3' homology arms, respectively (Figure 1b). Furthermore,  
394 particular sequences instead of remained nucleotides from exon 8 (Leu-Ala-Thr-Leu-Lys-Thr-Cys)  
395 and exon 9 (Val-Leu-Val-Lys-Met) were added to the end of the 5' homology arm  
396 (Supplementary 1b). Then, 375 bp *BleoR* CDS, 18 bp 6xHis tag, and 30 bp Poly A were designed  
397 to attach the DDT sequences.

398 The DDT cassette was ligated into the pRGEB31 vector containing the Cas9 expression  
399 cassette to construct the pDDT. It is worth remarking that to improve the HDR efficiency, we  
400 overexpressed HDR effectors CtIP and MRE11 (Tran *et al.*, 2019) and mutated the HDR inhibitor  
401 XRCC4 (Pierce *et al.*, 2001) simultaneously in this research. We constructed multiple fusion  
402 vectors, including Cas9 expression cassette, CtIP overexpression cassette, MRE11  
403 overexpression cassette, and *XRCC4* mutative cassette, improving the efficiency  
404 (Supplementary 5a-d).

405 In this study, and to expand the genome editing possible for woody plants, we applied  
406 *Agrobacterium* to deliver the optimized CRISPR–Cas9 system into poplar stems and generate  
407 stable transgenic poplars. Because (Yang *et al.*, 2016) reported that the HDR efficiency is  
408 directly related to the amount of DDT at S/G2 cell division phases, we used pathogenic  
409 suspension with an  $OD_{600}=2.5$  ( $\sim 2 \times 10^9$  cell ml<sup>-1</sup>) and the ratio of 4:1 pDDT/pgRNA to increase  
410 DDT fragments during S/G2 cell division (Tran *et al.*, 2019) and to avoid off-target editing  
411 caused by the extra accumulation of pgRNA (Hajjahmadi *et al.*, 2019) (Figure 2a). Transformant  
412 grown buds on zeocin were selected to analyze (Figure 2a).

413 According to figure 2b, we transferred pgRNA and pDDT into the explants via  
414 experiment I (ExI). After that, we decided to design a plasmid that included a fused CtIP (Tran *et*

415 al., 2019) and Cas9 (pgCtIP) instead of pgRNA with a ratio of 4:1 pDDT/pgCtIP to promote HDR  
416 efficiency in poplars via experiment II (ExII) (Figure 2b). Only seventeen events were observed  
417 to be grown from a total of 42 regenerated buds. Also, only one recovered event was discerned  
418 after transferring on rooting media. In continuous and to investigate the effect of MRE11 (Tran  
419 et al., 2019) to improve HDR efficiency in poplars, we designed plasmid harboring a combined  
420 MRE11 and Cas9 (pgMR) instead of pgRNA with the same ratio of 4:1 pDDT/pgMR via  
421 experiment III (ExIII) (Figure 2b). In this experiment, we observed fifteen grown buds, and only  
422 one recovered edited event. Because our experiments did not show significant recovered  
423 events in overcoming NHEJ to integrate *BleoR*, we determined to design experiment IV (ExIV),  
424 including one plasmid harboring fused both MRE11 and CtIP with Cas9 (pgCtMR). Recovered  
425 events were increased insignificantly to four (Figure 2b). Therefore, we decided to  
426 target *XRCC4* as one key factor in the NHEJ pathway (Maruyama et al., 2015) besides CtIP and  
427 MRE11 overexpressing. For this purpose, we designed experiment V (ExV) using one plasmid  
428 harboring *XRCC4* gRNA and also fused both MRE11 and CtIP with Cas9 (pggCtMR). We tried to  
429 transfer this plasmid into the plant cells with the same ratio of 4:1 pDDT/pggCtMR. In this  
430 experiment, recovered events were shown increased surprisingly to twelve events from thirty-  
431 one grown buds on selection media (Figure 2b).

#### 432 **Transformants verification via Western blotting, RT-PCR, and Southern blotting**

433 Several methods, such as western blotting, RT-PCR, and Southern blotting, were applied  
434 to verify the happened HDR in resistant transformants. Several methods, such as western  
435 blotting, RT-PCR, and Southern blotting, were applied to verify the happened HDR in resistant  
436 transformants. We decided to combine a 6XHis tag to the *BleoR* CDS (Figure 1b) to show the  
437 integration of *BleoR* and *MKK2* through target genomes using Western blotting. Through  
438 screening the western blotting of all transformants grown on zeocin, we detected no edited  
439 events in ExI, but one ExII event (II#29) showed a band of 54 KDa (Figure 3a), which might be  
440 the candidate for the successful integration of the *BleoR* (~13.7 KDa) fused by the *MKK2* (~40.5  
441 KDa) (Figure 3b). In continue and through ExIII events, we found only one event (III#6) with a  
442 band of 14 KDa (Figure 3a), and we deemed that only *BleoR* CDS was integrated completely and  
443 sudden mutations might knock out *MKK2* throughout exons7, 8, or 9 (Figure 3b). We then

444 screened ExIV events and found three events (IV#17, #54, and #68) with bands about 54 KDa,  
445 and one event (IV#90) about 14 KDa (Figure 3a). Surprisingly, we found ten events (V#21, #25,  
446 #29, #32, #39, #59, #73, #88, #91, and #94) with bands about 54 KDa within ExV, and two  
447 events (V#37, and #53) with bands about 14 kDa (Figure 3a).

448 We designed two RT-PCR assays to confirm the designed editions in transformed  
449 poplars. Considering the targeting of exon8 from *MKK2* (Figure 1b) in this study and then our  
450 attempts to repair the damaged area together with the integration of the *BleoR* gene, we  
451 decided to design the first RT-PCR experiment in such a way as to repair the infected area and  
452 reassure the correct *MKK2* gene expression in transformant poplars (Figure 3c and d). As  
453 expected, no bands were observed from ExI events. Three ExII events (#24, #29, and #35) and  
454 four ExIII events (#10, #23, #36, and #45) showed 920 bp bands (Figure 3e) respectively. Also,  
455 ExIV events (#9, #17, #39, #45, #54, #60, #68, #72, and #83) showed similar bands with WT.  
456 Surprisingly, twenty events of ExV exhibited the complete *MKK2* expression with similar bands  
457 with WT. Regarding the binding of *MKK2* and *BleoR* in the target genome (Figure 1b) and verify  
458 that, and also according to the design of DDT to include the required nucleotides from exon7,  
459 we decided to design a second RT-PCR using pDDT as the positive control (Figure 3d). The  
460 second RT-PCR also revealed no desired 413 bp band through ExI events (Figure 3f). ExII events  
461 revealed only one 413 bp amplification (#29), but ExIII events revealed no desired band. We  
462 then considered ExIV and observed three events (#17, #54, and #68), while ExV revealed  
463 significantly increased ten events (#21, #25, #29, #32, #39, #59, #73, #88, #91, and #94) as 413  
464 bp bands. All events showing bands with Western blotting and RT-PCR assays were selected for  
465 further analyses. The probe of *BleoR* sequences was designed for Southern blotting (Figure 3g).  
466 Several events (III#6, IV#90, V#37, and V#53), which were not amplified through the second RT-  
467 PCR, were reverified in Southern blotting.

#### 468 **Accurate investigation of edited events and HDR efficiency**

469 Cermak et al. (2015) could improve the HDR efficiency by ten-fold in tomato and  
470 integrated the 35S promoter in upstream of the *ANT1* gene. Tran et al. (2019) could promote  
471 the HDR efficiency in mammals with at least a 2-fold increase in HDR and a 6-fold increase in  
472 HDR/NHEJ ratio. Aslan et al. (2017) increased HDR efficiency to 25.7% in the *Xenopus*



473 *tropicalis* genome by inserting small pieces of DNA, while Danilo et al. (2018) succeeded in  
474 knocking in a DDT with 400 bp into the tomato genome with low efficiency of 1.29%. Jang et al.  
475 (2018) attempted to develop HDR efficiency to 38% in mouse lines by applying multiple sgRNAs,  
476 and Menchaca et al. (2020) tried to enhance the HDR efficiency to 61.5% in sheep utilizing  
477 single strand oligodeoxynucleotides. Still, there are some reports on *Populus* genome editing,  
478 but they are limited only to knock out genes, and mutations happened by Cas9 and Cas12a (An  
479 et al., 2020; Di Fan et al., 2015; Liu et al., 2015), but no report has been carried out on  
480 improving the HDR efficiency in poplar. In this study, we tried to create a recombinant genome  
481 in poplars using an HDR system. We then tried to detect the actual HDR events via TaqMan  
482 real-time PCR.

483 Two probes, FAM1 and FAM2, were designed for the 3' and 5'-end *BleoR* CDS area  
484 (Figure 4a). The transformants were assumed to be edited via exhibiting both fluorescent  
485 signals of FAM1 and FAM2 (Figure 4b). In ExI, the averages of fluorescent signals of FAM1  $\Delta\Delta$ Ct  
486 and FAM2  $\Delta\Delta$ Ct were shown proximal to 0 (Supplementary 13a). Most signals of ExI events  
487 exhibited as the mutant or WT, with a few partial FAM1 or FAM2 fluorescence (Figure 4c).  
488 Sanger sequencing was conducted to confirm these results. So, no edited events were achieved  
489 through ExI (Supplementary 7). Transformants of ExII and -III showed an increase in the signal  
490 densities of the FAM1 and FAM2 (Figure 4d, and e). The signal average of ExII transformants  
491 were about 14.5 and 13.5, while ExIII events exhibited more FAM1  $\Delta\Delta$ Ct about 16 and a lesser  
492 FAM2  $\Delta\Delta$ Ct about 10 (Supplementary 13b, and c). The alignment of Sanger sequencing well  
493 conformed to this result. In ExII, we found four fully edited events (II#7, II#19, II#53, and II#59),  
494 four FAM1 partial edited events (II#13, II#21, II#35, and II#41), and four FAM2 partial edited  
495 events (II#3, II#11, II#14, and II#23) (Supplementary 8; Supplementary 14a). In ExIII, we verified  
496 three fully edited events (III#21, III#45, and III#61), five FAM1 partial edited events (III#10,  
497 III#23, III#27, III#32, and III#53), and three FAM2 partial edited events (III#6, III#17, and III#36)  
498 (Supplementary 9; Supplementary 14b). In ExIV, the signal density of edited events increased  
499 significantly (Figure 4f). The mean fluorescent signals of FAM1  $\Delta\Delta$ Ct and FAM2  $\Delta\Delta$ Ct showed an  
500 increase of about 19 and 15, respectively (Supplementary 13d). In total, nine fully edited events  
501 (IV#9, IV#27, IV#39, IV#45, IV#54, IV#68, IV#79, IV#83, and IV#90), seven FAM1 partial edited

502 events (IV#13, IV#17, IV#19, IV#46, IV#60, IV#75, and IV#85), and four FAM2 partial edited  
503 events (IV#13, IV#76, IV#80, and IV#92) (Supplementary 10; Supplementary 14c) were detected.  
504 Finally, the signal density of edited transformants in ExV was remarkably increased (Figure 4g).  
505 The mean fluorescent signals of FAM1  $\Delta\Delta C_t$  and FAM2  $\Delta\Delta C_t$  were increased about 21.5 and 18,  
506 respectively (Supplementary 13e). In total, 15 fully edited events (V#3, V#9, V#21, V#25, V#29,  
507 V#33, V#39, V#67, V#73, V#79, V#88, V#91, V#92, V#94, and V#101) were discovered  
508 (Supplementary 11; Supplementary 14d; Supplementary 17). Total FAM fluorescent signals  
509 (FAM1, FAM2, and FAM1&2) indicated the promotion of happened HDR through experiment  
510 events (Figure 4h). Overexpression of HDR effectors, CtIP, and MRE11 (ExIV), could dramatically  
511 increase FAM signals in comparison with the only overexpression of CtIP (ExII) or MRE11 (ExIII).  
512 Moreover, *XRCC4* deficiency, simultaneously with the overexpression of CtIP and MRE11,  
513 dramatically improved the HDR in ExV.

514         According to (Shao et al., 2017), improving the HDR factors causes to improve HDR  
515 efficiency. Tran et al. (2019) could improve the HDR efficiency up to 19-fold with overexpressing  
516 CtIP and MRE11 and inhibiting NHEJ factors (Li et al., 2018). In this study, we considered  
517 inhibiting *XRCC4* as one LIG4 cofactor (Grawunder et al., 1998b) to increase HDR efficiency. The  
518 HDR efficiency investigation confirmed that the NHEJ pathway deficiency is meaningfully more  
519 efficient to HDR development than on only the overexpression of HDR factors (Figure 4i).  
520 Overexpression of CtIP, and MRE11, could dramatically increase FAM signals compared to the  
521 only overexpression of CtIP or MRE11. Furthermore, *XRCC4* deficiency, together with the  
522 overexpression of CtIP and MRE11, dramatically enhanced the HDR in ExV. According to Figure  
523 4i, the expression of integrated exogenous *BleoR* represents HDR efficiency. We performed  
524 real-time PCR to evaluate the percentage of *BleoR* expression  $\Delta\Delta C_t$  mean (Supplementary 15a)  
525 and then compare and illustrate the bar plot supported by standard distribution curves (Figure  
526 4i; Supplementary 15b). The *BleoR* expression increased from -1.2287 in ExI to 4.40787 (5.6%)  
527 in ExII and 6.11543 (7.3%) in ExIII. The expression in ExIV and ExV raised to 19.06057 (20.26%)  
528 and 48.90032 (50.1%). We resulted that the *XRCC4* deficiency, together with the  
529 overexpression of CtIP and MRE11, was the most efficient system for HDR-based integration  
530 and improved more HDR happenings than the expression of HDR effectors CtIP and MRE11

531 (Figure 4i). We resulted that the *XRCC4* deficiency, together with the overexpression of CtIP and  
532 MRE11, was the most efficient system for HDR-based integration and improved more HDR  
533 happenings than the expression of HDR effectors CtIP and MRE11.

#### 534 **The effect of efficient HDR on the expression of NHEJ and HDR factors**

535 It is required to investigate targeted *MKK2* and integrated *BleoR* gene expressions and  
536 their interdependence. The expression of each of them proves the HDR happening and shows  
537 the regular functions of these genes in the new version of the poplar genome. We analyzed RT-  
538 qPCR achieved data and used Violon plots to describe the distributed expressions  
539 of *MKK2* and *BleoR* genes through all events (Figure 5a-d) and Column plots to show their  
540 expressions for each event separately (Supplementary 16). Analysis among ExI events revealed  
541 distributed *MKK2* and *BleoR* expressions of about +1 and -1 but, the ExII events exhibited above  
542 expressions between about 100 and zero with medians about zero (Figure 5a and b). Within the  
543 ExII, we discovered three events with *MKK2* expression (#21, #29, and #35) and only one event  
544 with *BleoR* expression (#29) (Supplementary 16). We then analyzed these gene expressions  
545 from ExIII and discovered promoted distributed expressions of *MKK2* (Figure 5c). In this  
546 experiment, we found four events with *MKK2* expression (#10, #23, #36, and #45) and one  
547 event with *BleoR* expression (#6) (Supplementary 16). RT-qPCR results through ExV events  
548 revealed enhanced distributions of *BleoR* and *MKK2* expressions (Figure 5d). In this experiment,  
549 we achieved nine events with *MKK2* expression (#9, #17, #39, #45, #54, #60, #68, #79, and #83)  
550 and four events with *BleoR* expression (#17, #54, #68, and #90) (Supplementary 16). Regarding  
551 the expressions of these genes from ExV events, we observed significant promotions  
552 in *MKK2* and *BleoR* distributed expressions with a median of about 100 (Figure 5e). Also, the  
553 column bar analysis confirmed these distributions with twenty *MKK2* expressions within ExV  
554 events (#3, #9, #18, #21, #25, #29, #32, #33, #39, #59, #67, #73, #79, #82, #86, #88, #91, #92,  
555 #94, and #101) and twelve *BleoR* expressions (#21, #25, #29, #32, #37, #39, #53, #59, #73, #88,  
556 #91, and #94) (Supplementary 16).

557 Moreover, we decided to assess gene expressions involved in HDR and NHEJ pathways  
558 affected by our increasing HDR efficiency plans. We used a Heat-map plot to interpret the  
559 obtained data from RT-qPCR (Figure 5f). While the expressions

560 of *CtIP* (~116%), *MRE11* (~115%), *BRCA1* (~114%), *Rad50* (~113%), and *Rad51* (~116%) were  
561 increased through ExI compared to WT, more expressions were observed in *Lig4* (~146%)  
562 and *XRCC4* (~143%) (Figure 5f). The expression of *CtIP* was increased impressively (~166%) via  
563 ExII compared with WT, while the expressions  
564 of *MRE11* (~129%), *BRCA1* (~119%), *Rad50* (~120%), and *Rad51* (~121%) were increased  
565 insignificantly. Through ExII, the expressions of *Lig4* (~104%) and *XRC44* (~105%) were  
566 decreased compared to ExI (Figure 5f). Within ExIII, the expression of *MRE11* was increased  
567 impressively (~162%), but the expressions of *CtIP* (~134%), *BRCA1* (~120%), *Rad50* (~122%),  
568 and *Rad51* (~119%) were increased slightly. Within this experiment, the expressions  
569 of *Lig4* (~107%) and *XRC44* (~103%) were decreased, contrasted with ExI (Figure 4f). All HDR  
570 factors revealed enhanced expressions among ExIV  
571 as *CtIP* (~165%), *MRE11* (~164%), *BRCA1* (~130%), *Rad50* (~128%), and *Rad51* (~129%), but the  
572 expressions of *Lig4* (~101%) and *XRC44* (~99%) were decreased more compared with ExI (Figure  
573 5f). *XRCC4* deficiency in ExV and enhancing *CtIP* and *MRE11* expressions caused enhancing the  
574 expressions of *CtIP* (~170%) and *MRE11* (~165%) much more than WT events. Also, the  
575 expression of *Lig4* (~87%) revealed more decreased than WT, and *XRCC4* was knocked out.  
576 Through ExV, the other HDR factors *BRCA1* (~145%), *Rad50* (~139%), and *Rad51* (~142%) also  
577 revealed more expressions (Figure 5f).

#### 578 ***XRCC4* deficient dramatically enhanced HDR efficiency and decreased polymorphisms**

579 NHEJ is identified by introducing irregular small insertions or deletions (indels) into the  
580 targeted site. Notwithstanding the mutagenicity of NHEJ for its error-prone trait, its active  
581 kinetics has a role in repairing genome integrity, distinctly by crushing chromosomal  
582 translocations, mostly for the bulk of repair events (Ceccaldi et al., 2016). It has been exhibited  
583 a numerous percentage of about 70% of polymorphisms, especially deletions in *Populus*  
584 genome editing by the Cas system while knocking down the PDS gene family (An et al., 2020).  
585 Menchaca et al. (2020) recorded 17.8% indel mutations in sheep genome editing, with 61.5%  
586 knock-in mutations happened by HDR. Also, it has been shown that silencing of NHEJ factors  
587 such as *Ku70* and *Ku80* caused to reduce indels significantly from 64% to 38% and 39.4%,  
588 respectively (Li et al., 2018).

589 In this study, and to test whether the HDR promotion affects decreasing the  
590 polymorphisms, we analyzed the variant genotypes, protein effects, and nucleotide genotyping  
591 within the 5' and 3' homologous arms and also the knocked-in fragments from recovered  
592 events. We firstly analyzed the homology arms to detect polymorphisms and detected seven  
593 polymorphism varieties, including deletions, deletion tandem repeats, insertions, insertion  
594 tandem repeats, SNP transitions (A to C or G to T and reversely), SNP transversions (Purines to  
595 pyrimidines or reversely), and substitutions (Supplementary Table 3). It has been shown that  
596 the promotion of HDR via ExI to ExV events push to migrate Insertion and Deletion (InDel)  
597 nucleotides from the 5' region of knocked-in fragments (*BleoR*) to the 3' region (6xHis and  
598 PolyA) (Figure 6a). It means that we achieved more *BleoR* expression via ExV events compared  
599 to the other experiments. The mean comparisons of the InDel nucleotides revealed that the  
600 promoted HDR by *XRCC4* deficiency caused to decrease in InDel nucleotides considerably via  
601 ExV events (65) compared to the ExI (454), ExII (263), ExIII (177), and ExIV events (295) (Figure  
602 6b). We then calculated the only number of happened polymorphisms (Not nucleotides) and  
603 then compared the means obtained from the total polymorphisms issued within designed  
604 experiments. It has been observed that the HDR happening through ExI events provoked the  
605 highest polymorphisms, significantly more than ExIV and -V events (Figure 6c). We also  
606 observed more happened polymorphisms within ExII and -III than ExIV and -V (Figure 6c). We  
607 then decided to investigate all happened polymorphisms in more detail from the homology  
608 arms and knocked-in *BleoR* from the recovered poplar genome (Supplementary Table 4). We  
609 identified the highest frequency of deletions through ExI events and the least within ExV events  
610 (Figure 6d). We also observed that *XRCC4* deficiency revealed the least of SNP transition. The  
611 overexpression of *CtIP* decremented deletion tandem repeats (ExII), and the overexpression  
612 of *MRE11* decremented SNPs, SNP transitions, and SNP transversions (Figure 6d). The  
613 overexpression of *CtIP* and *MRE11* simultaneously (ExIV) decremented substitution  
614 polymorphisms (Figure 6d). Moreover, the whisker plot of total polymorphisms presented the  
615 maximum distribution of polymorphisms through ExI events and the minimum of those in ExV  
616 events (Figure 6d).

## 617 **Functional analyzes of MKK2 and phenotypic changes**

618 It has been shown that MAPKs genes direct cellular responses against abiotic stresses  
619 such as salinity (Mohanta et al., 2015; Sun et al., 2015). Regarding these results, we decided to  
620 evaluate *MKK2* expression from re-planted recovered events on the soil before and after salt  
621 stress to show the proper *MKK2* locus maintain by efficient HDR through exon7, 8, and 9. The  
622 functional analysis of *MKK2* in survived recovered events (II#29, IV#17, IV#54, IV#68, V#21,  
623 V#25, V#29, V#32, V#39, V#59, V#73, V#88, V#91, and V#94) from ExII, -IV and -V and  
624 comparing them with WT poplars revealed a regular expression in all events (~95%-100%)  
625 before stress and a stable overexpression induced by salt (168%-173%) after stress (Figure 7;  
626 Supplementary Table 5). Also, stem lengths and diameters of all mentioned above events  
627 before and after salt stress were measured and revealed no significant differences between  
628 survived recovered events and WT poplars (Figure 7; Supplementary Table 5).

629 In summary, we have proved that *XRCC4* deficiency caused to enhance the HDR  
630 efficiency meaningfully, therefore greatly expanding our capacity to improve hereditary  
631 developments in poplar. This breakthrough technology is likely to encourage biotechnological  
632 researches, breeding programs, and forest conservation of tree species.

## 633 **Supplementary information**

634 Supplemental information is available for this paper.

## 635 **Funding**

636 This project was funded by the National Key Program on Transgenic Research  
637 (2018ZX08020002), the National Natural Science Foundation of China (No. 31971682,  
638 31570650), the Priority Academic Program Development of Jiangsu Higher Education  
639 Institutions, the Talent Funding Project of Nanjing Forestry University (No. 163108059).

## 640 **Author contribution**

641 AM: Conceptualization, Software, Formal analysis, Writing - Original Draft, Visualization,  
642 Project administration, and Funding acquisition; HW: Methodology, Formal analysis, Writing -  
643 Review & Editing and Data Curation; ZHC: Conceptualization, Validation, Data Curation, Writing  
644 - Review & Editing; WS, JZ, DL: Validation, Writing - Review & Editing; LY: Conceptualization,

645 Software, Formal analysis, Visualization, and Funding acquisition; QZ: Conceptualization,  
646 Software, Formal analysis, Visualization, Supervision, and Funding acquisition.

#### 647 **Conflict of interest**

648 The authors declare that they have no conflict of interest.

#### 649 **Acknowledgment**

650 We thank all researchers, especially professor Zhong-Hua Chen, to improve this research  
651 with their directions.

#### 652 **References**

- 653 Ali, Z., Shami, A., Sedeek, K., Kamel, R., Alhabsi, A., Tehseen, M., Hassan, N., Butt, H.,  
654 Kababji, A., Hamdan, S. M. and Mahfouz, M. M. (2020) Fusion of the Cas9 endonuclease  
655 and the VirD2 relaxase facilitates homology-directed repair for precise genome engineering  
656 in rice. *Commun Biol* **3**.
- 657 An, Y., Geng, Y., Yao, J., Fu, C., Lu, M., Wang, C. and Du, J. (2020) Efficient Genome Editing  
658 in Populus Using CRISPR/Cas12a. *Front Plant Sci* **11**, 593938.
- 659 Aslan, Y., Tadjuidje, E., Zorn, A. M. and Cha, S. W. (2017) High-efficiency non-mosaic  
660 CRISPR-mediated knock-in and indel mutation in F0 *Xenopus*. *Development* **144**, 2852–  
661 2858.
- 662 Bewg, W. P., Ci, D. and Tsai, C.-J. (2018) Genome Editing in Trees: From Multiple Repair  
663 Pathways to Long-Term Stability. *Frontiers in Plant Science* **9**.
- 664 Butler, N. M., Baltes, N. J., Voytas, D. F. and Douches, D. S. (2016) Geminivirus-Mediated  
665 Genome Editing in Potato (*Solanum tuberosum* L.) Using Sequence-Specific Nucleases.  
666 *Front Plant Sci* **7**, 1045.
- 667 Ceccaldi, R., Rondinelli, B. and D'Andrea, A. D. (2016) Repair Pathway Choices and  
668 Consequences at the Double-Strand Break. *Trends in cell biology* **26**, 52–64.
- 669 Cermak, T., Baltes, N. J., Cegan, R., Zhang, Y. and Voytas, D. F. (2015) High-frequency,  
670 precise modification of the tomato genome. *Genome Biol* **16**, 232.
- 671 Chen, X. Y., Wang, P. K., Zhao, F. F., Lu, L., Long, X. F., Hao, Z. D., Shi, J. S. and Chen, J. H.  
672 (2020) The *Liriodendron chinense* MKK2 Gene Enhances *Arabidopsis thaliana* Salt  
673 Resistance. *Forests* **11**.

- 674 Dahan-Meir, T., Filler-Hayut, S., Melamed-Bessudo, C., Bocobza, S., Czosnek, H., Aharoni, A.,  
675 and Levy, A. A. (2018) Efficient in planta gene targeting in tomato using geminiviral  
676 replicons and the CRISPR/Cas9 system. *Plant J* **95**, 5–16.
- 677 Danilo, B., Perrot, L., Botton, E., Nogue, F. and Mazier, M. (2018) The DFR locus: A smart  
678 landing pad for targeted transgene insertion in tomato. *Plos One* **13**.
- 679 Di Fan, Liu, T., Li, C., Jiao, B., Li, S., Hou, Y. and Luo, K. (2015) Efficient CRISPR/Cas9-  
680 mediated Targeted Mutagenesis in Populus in the First Generation. *Sci Rep-Uk* **5**, 12217.
- 681 Doench, J. G., Hartenian, E., Graham, D. B., Tothova, Z., Hegde, M., Smith, I., Sullender, M.,  
682 Ebert, B. L., Xavier, R. J. and Root, D. E. (2014) Rational design of highly active sgRNAs  
683 for CRISPR-Cas9-mediated gene inactivation. *Nat Biotechnol* **32**, 1262–1267.
- 684 Friesner, J. and Britt, A. B. (2003) Ku80- and DNA ligase IV-deficient plants are sensitive to  
685 ionizing radiation and defective in T-DNA integration. *Plant J* **34**, 427–440.
- 686 Gao, J., Zhang, S., He, W. D., Shao, X. H., Li, C. Y., Wei, Y. R., Deng, G. M., Kuang, R. B., Hu,  
687 C. H., Yi, G. J. and Yang, Q. S. (2017) Comparative Phosphoproteomics Reveals an  
688 Important Role of MKK2 in Banana (*Musa* spp.) Cold Signal Network. *Sci Rep-Uk* **7**.
- 689 Gil-Humanes, J., Wang, Y., Liang, Z., Shan, Q., Ozuna, C. V., Sanchez-Leon, S., Baltes, N. J.,  
690 Starker, C., Barro, F., Gao, C. and Voytas, D. F. (2017) High-efficiency gene targeting in  
691 hexaploid wheat using DNA replicons and CRISPR/Cas9. *Plant J* **89**, 1251–1262.
- 692 Grawunder, U., Zimmer, D., Fugmann, S., Schwarz, K. and Lieber, M. R. (1998a) DNA ligase  
693 IV is essential for V(D)J recombination and DNA double-strand break repair in human  
694 precursor lymphocytes. *Mol Cell* **2**, 477–484.
- 695 Grawunder, U., Zimmer, D., Kulesza, P., and Lieber, M. R. (1998b) Requirement for an  
696 interaction of XRCC4 with DNA ligase IV for wild-type V(D)J recombination and DNA  
697 double-strand break repair in vivo. *J Biol Chem* **273**, 24708–24714.
- 698 Hajiahmadi, Z., Movahedi, A., Wei, H., Li, D. W., Orooji, Y., Ruan, H. H. and Zhuge, Q. (2019)  
699 Strategies to Increase On-Target and Reduce Off-Target Effects of the CRISPR/Cas9 System  
700 in Plants. *Int J Mol Sci* **20**.
- 701 Hsu, P. D., Scott, D. A., Weinstein, J. A., Ran, F. A., Konermann, S., Agarwala, V., Li, Y., Fine,  
702 E. J., Wu, X., Shalem, O., Cradick, T. J., Marraffini, L. A., Bao, G. and Zhang, F. (2013)  
703 DNA targeting specificity of RNA-guided Cas9 nucleases. *Nat Biotechnol* **31**, 827–832.



- 704 Hummel, A. W., Chauhan, R. D., Cermak, T., Mutka, A. M., Vijayaraghavan, A., Boyher, A.,  
705 Starker, C. G., Bart, R., Voytas, D. F. and Taylor, N. J. (2018) Allele exchange at the EPSPS  
706 locus confers glyphosate tolerance in cassava. *Plant Biotechnol J* **16**, 1275–1282.
- 707 Jang, D. E., Lee, J. Y., Lee, J. H., Koo, O. J., Bae, H. S., Jung, M. H., Bae, J. H., Hwang, W. S.,  
708 Chang, Y. J., Lee, Y. H., Lee, H. W. and Yeom, S. C. (2018) Multiple sgRNAs with  
709 overlapping sequences enhance CRISPR/Cas9-mediated knock-in efficiency. *Exp Mol Med*  
710 **50**.
- 711 Li, G. L., Liu, D. W., Zhang, X. W., Quan, R., Zhong, C. L., Mo, J. X., Huang, Y. Q., Wang, H.  
712 Q., Ruan, X. F., Xu, Z., Zheng, E. Q., Gu, T., Hong, L. J., Li, Z. C., Wu, Z. F., and Yang, H.  
713 Q. (2018) Suppressing Ku70/Ku80 expression elevates homology-directed repair efficiency  
714 in primary fibroblasts. *Int J Biochem Cell B* **99**, 154–160.
- 715 Li, J., Hong, S., Chen, W., Zuo, E. and Yang, H. (2019a) Advances in detecting and reducing  
716 off-target effects generated by CRISPR-mediated genome editing. *J Genet Genomics*.
- 717 Li, J., Meng, X., Zong, Y., Chen, K., Zhang, H., Liu, J. and Gao, C. (2016) Gene replacements  
718 and insertions in rice by intron targeting using CRISPR-Cas9. *Nat Plants* **2**, 16139.
- 719 Li, S., Li, J., He, Y., Xu, M., Zhang, J., Du, W., Zhao, Y. and Xia, L. (2019b) Precise gene  
720 replacement in rice by RNA transcript-templated homologous recombination. *Nat Biotechnol*  
721 **37**, 445–450.
- 722 Li, Z., Liu, Z. B., Xing, A., Moon, B. P., Koellhoffer, J. P., Huang, L., Ward, R. T., Clifton, E.,  
723 Falco, S. C., and Cigan, A. M. (2015) Cas9-Guide RNA Directed Genome Editing in  
724 Soybean. *Plant Physiol* **169**, 960–970.
- 725 Lin, Q., Zong, Y., Xue, C., Wang, S., Jin, S., Zhu, Z., Wang, Y., Anzalone, A. V., Raguram, A.,  
726 Doman, J. L., Liu, D. R. and Gao, C. (2020) Prime genome editing in rice and wheat. *Nat*  
727 *Biotechnol* **38**, 582–585.
- 728 Liu, M., Rehman, S., Tang, X., Gu, K., Fan, Q., Chen, D. and Ma, W. (2019) Methodologies for  
729 Improving HDR Efficiency. *Frontiers in Genetics* **9**.
- 730 Liu, T.-t., Di Fan, Ran, L.-y., Jiang, Y.-z., Liu, R. and Luo, K.-m. (2015) Highly efficient  
731 CRISPR/Cas9-mediated targeted mutagenesis of multiple genes in Populus. *Yi Chuan =*  
732 *Hereditas* **37**, 1044–1052.

- 733 Lu, Y., Tian, Y., Shen, R., Yao, Q., Wang, M., Chen, M., Dong, J., Zhang, T., Li, F., Lei, M. and  
734 Zhu, J. K. (2020) Targeted, efficient sequence insertion and replacement in rice. *Nat*  
735 *Biotechnol* **38**, 1402–1407.
- 736 Maruyama, T., Dougan, S. K., Truttmann, M. C., Bilate, A. M., Ingram, J. R. and Ploegh, H. L.  
737 (2015) Increasing the efficiency of precise genome editing with CRISPR-Cas9 by inhibition  
738 of non-homologous end joining. *Nat Biotechnol* **33**, 538–542.
- 739 Menchaca, A., dos Santos-Neto, P. C., Souza-Neves, M., Cuadro, F., Mulet, A. P., Tesson, L.,  
740 Chenouard, V., Guiffes, A., Heslan, J. M., Gantier, M., Anegon, I. and Crispo, M. (2020)  
741 Otofelin gene editing in sheep via CRISPR-assisted ssODN-mediated Homology Directed  
742 Repair. *Sci Rep-Uk* **10**.
- 743 Mohanta, T. K., Arora, P. K., Mohanta, N., Parida, P. and Bae, H. (2015) Identification of new  
744 members of the MAPK gene family in plants shows diverse conserved domains and novel  
745 activation loop variants. *BMC genomics* **16**, 58.
- 746 Movahedi, A., Zhang, J. X., Amirian, R. and Zhuge, Q. (2014) An Efficient Agrobacterium-  
747 mediated Transformation System for Poplar. *Int J Mol Sci* **15**, 10780–10793.
- 748 Movahedi, A., Zhang, J. X., Gao, P. H., Yang, Y., Wang, L. K., Yin, T. M., Kadkhodaei, S.,  
749 Ebrahimi, M. and Qiang, Z. G. (2015) Expression of the chickpea CarNAC3 gene enhances  
750 salinity and drought tolerance in transgenic poplars. *Plant Cell Tiss Org* **120**, 141–154.
- 751 Panier, S. and Boulton, S. J. (2014) Double-strand break repair: 53BP1 comes into focus. *Nat*  
752 *Rev Mol Cell Biol* **15**, 7–18.
- 753 Pierce, A. J., Hu, P., Han, M., Ellis, N. and Jasin, M. (2001) Ku DNA end-binding protein  
754 modulates homologous repair of double-strand breaks in mammalian cells. *Genes Dev* **15**,  
755 3237–3242.
- 756 Puchta, H. (2005) The repair of double-strand breaks in plants: mechanisms and consequences  
757 for genome evolution. *J Exp Bot* **56**, 1–14.
- 758 Qi, Y., Zhang, Y., Zhang, F., Baller, J. A., Cleland, S. C., Ryu, Y., Starker, C. G. and Voytas, D.  
759 F. (2013) Increasing frequencies of site-specific mutagenesis and gene targeting in  
760 Arabidopsis by manipulating DNA repair pathways. *Genome Res* **23**, 547–554.
- 761 Sambrook, J., Fritsch, E.F. and Maniatis, T. (1989). *Molecular cloning: a laboratory manual*,  
762 2nd edn. Cold Spring Harbor, NY: Cold Spring Harbor Laboratory Press.

- 763 Schiml, S., Fauser, F. and Puchta, H. (2014) The CRISPR/Cas system can be used as nuclease  
764 for in planta gene targeting and as paired nickases for directed mutagenesis in Arabidopsis  
765 resulting in heritable progeny. *Plant J* **80**, 1139–1150.
- 766 Shao, S. M., Ren, C. H., Liu, Z. T., Bai, Y. C., Chen, Z. L., Wei, Z. H., Wang, X., Zhang, Z. Y.  
767 and Xu, K. (2017) Enhancing CRISPR/Cas9-mediated homology-directed repair in  
768 mammalian cells by expressing *Saccharomyces cerevisiae* Rad52. *Int J Biochem Cell B* **92**,  
769 43–52.
- 770 Shi, J., Gao, H., Wang, H., Lafitte, H. R., Archibald, R. L., Yang, M., Hakimi, S. M., Mo, H. and  
771 Habben, J. E. (2017) ARGOS8 variants generated by CRISPR-Cas9 improve maize grain  
772 yield under field drought stress conditions. *Plant Biotechnol J* **15**, 207–216.
- 773 Song, F. and Stieger, K. (2017) Optimizing the DNA Donor Template for Homology-Directed  
774 Repair of Double-Strand Breaks. *Mol Ther Nucleic Acids* **7**, 53–60.
- 775 Sun, W., Chen, H., Wang, J., Sun, H. W., Yang, S. K., Sang, Y. L., Lu, X. B. and Xu, X. H.  
776 (2015) Expression analysis of genes encoding mitogen-activated protein kinases in maize  
777 provides a key link between abiotic stress signaling and plant reproduction. *Funct Integr*  
778 *Genomic* **15**, 107–120.
- 779 Svitashv, S., Schwartz, C., Lenderts, B., Young, J. K. and Cigan, A. M. (2016) Genome editing  
780 in maize directed by CRISPR-Cas9 ribonucleoprotein complexes. *Nat Commun* **7**.
- 781 Svitashv, S., Young, J. K., Schwartz, C., Gao, H., Falco, S. C. and Cigan, A. M. (2015)  
782 Targeted Mutagenesis, Precise Gene Editing, and Site-Specific Gene Insertion in Maize  
783 Using Cas9 and Guide RNA. *Plant Physiol* **169**, 931–945.
- 784 Symington, L. S., and Gautier, J. (2011) Double-strand break end resection and repair pathway  
785 choice. *Annu Rev Genet* **45**, 247–271.
- 786 Tang, X., Sretenovic, S., Ren, Q., Jia, X., Li, M., Fan, T., Yin, D., Xiang, S., Guo, Y., Liu, L.,  
787 Zheng, X., Qi, Y. and Zhang, Y. (2020) Plant Prime Editors Enable Precise Gene Editing in  
788 Rice Cells. *Mol Plant* **13**, 667–670.
- 789 Teige, M., Scheickl, E., Eulgem, T., Dóczi, R., Ichimura, K., Shinozaki, K., Dangl, J. L., and Hirt,  
790 H. (2004) The MKK2 pathway mediates cold and salt stress signaling in Arabidopsis. *Mol*  
791 *Cell* **15**, 141–152.

- 792 Tran, N. T., Bashir, S., Li, X., Rossius, J., Chu, V. T., Rajewsky, K. and Kuhn, R. (2019)  
793 Enhancement of Precise Gene Editing by the Association of Cas9 With Homologous  
794 Recombination Factors. *Front Genet* **10**.
- 795 Van Vu, T., Sivankalyani, V., Kim, E.-J., Doan, D. T. H., Tran, M. T., Kim, J., Sung, Y. W.,  
796 Park, M., Kang, Y. J. and Kim, J.-Y. (2020) Highly efficient homology-directed repair using  
797 CRISPR/Cpf1-geminiviral replicon in tomato. *Plant Biotechnol J*.
- 798 Wang, M. G., Lu, Y. M., Botella, J. R., Mao, Y. F., Hua, K. and Zhu, J. K. (2017) Gene  
799 Targeting by Homology-Directed Repair in Rice Using a Geminivirus-Based CRISPR/Cas9  
800 System. *Mol Plant* **10**, 1007–1010.
- 801 Wu, J., and Yin, H. (2019) Engineering guide RNA to reduce the off-target effects of CRISPR. *J*  
802 *Genet Genomics*.
- 803 Xie, K. B., and Yang, Y. N. (2013) RNA-Guided Genome Editing in Plants Using a CRISPR-  
804 Cas System. *Mol Plant* **6**, 1975–1983.
- 805 Yang, D., Scavuzzo, M. A., Chmielowiec, J., Sharp, R., Bajic, A. and Borowiak, M. (2016)  
806 Enrichment of G2/M cell cycle phase in human pluripotent stem cells enhances HDR-  
807 mediated gene repair with customizable endonucleases. *Sci Rep* **6**, 21264.
- 808 Zhang, J. P., Li, X. L., Li, G. H., Chen, W., Arakaki, C., Botimer, G. D., Baylink, D., Zhang, L.,  
809 Wen, W., Fu, Y. W., Xu, J., Chun, N., Yuan, W., Cheng, T. and Zhang, X. B. (2017)  
810 Efficient precise knockin with a double cut HDR donor after CRISPR/Cas9-mediated double-  
811 stranded DNA cleavage. *Genome Biol* **18**, 35.
- 812 Zhou, X., Jacobs, T. B., Xue, L. - J., Harding, S. A. and Tsai, C. - J. (2015) Exploiting SNP s for  
813 biallelic CRISPR mutations in the outcrossing woody perennial *Populus* reveals 4 -  
814 coumarate: CoA ligase specificity and redundancy. *New Phytologist* **208**, 298–301.

## 815 **Figure legends**

816 **Figure 1:** Schematics of *MKK2* locus before and after edition and integrating exogenous  
817 *BleoR* CDS into the poplar genome. **(a)** Schematic of this research purpose to integrate  
818 exogenous *BleoR* into the poplar genome. Dash line reveals the target site. **(b)** Protospacer  
819 Adjacent Motif (PAM) was detected at the end of exon 8 to lead Cas9. 400 bp sequences from  
820 both sides of the CRISPR target were selected for HDR in this study. The 5' homology arm  
821 included part sequences of the intron between exon 6 and -7, exon 7, intron sequences

822 between exon 7 and -8, and a part of exon 8. The 3' homology arm included intron sequences  
823 between exon 8 and -9 and 3' UTR of the *MKK2* locus up to 400 bp. Designed DDT included  
824 remained sequences of exon 8, exon 9, BleoR CDS, 6xHis, and PolyA sequences flanked by the  
825 3'- and 5' homology arms. We added two special targets besides DDT. The DDT was then ligated  
826 into the pRGEB31 vector to form pDDT.

827 **Figure 2:** The transformation strategy and designing of experiments. **(a)** pDDT and  
828 pgRNA were mixed 4:1 and introduced to the *Agrobacterium tumefaciens* to form inoculator  
829 suspension. We condensed the inoculator up to  $OD_{600}=2.5$  and then dipped all cut off stems.  
830 The putatively edited events were regenerated on Zeocin. We allowed putative edited events  
831 to bud. The grown buds were then transferred on selective rooting media and allowed to be  
832 recovered. Recovered events were then planted on soil and following two weeks of acclimation  
833 introduced by salt stress. **(b)** Designed experiments for this study including (I) No HDR factors,  
834 (II) overloaded CtIP, (III) overloaded MRE11, (IV) Overloaded CtIP+MRE11, and (V) Overloaded  
835 CtIP+MRE11 with *XRCC4* deficiency.

836 **Figure 3:** Western blotting to reveal the fused 6xHis tag with BleoR integration into the  
837 poplar genome. **(a)** Different experiments exhibited different quantities of 6xHis tag fusion. **(b)**  
838 Schematic of fusion 6xHis tag with edited poplar genome triggered by different experiments.  
839 Shape 1 reveals successful fusion of *BleoR* and *MKK2* with about 54 kDa. Shape 2 reveals an  
840 unsuccessful combination of mentioned proteins with about 14 kDa. **(c)** Schematic of right HDR  
841 happening caused to attach exon 8 and 9 in the edited genome. **(d)** Schematic of proper  
842 integration in edited genome caused to connect the BleoR to the C-terminal of *MKK2*. **(e)** RT-  
843 PCR exhibited the HDR in exon 8 and 9, revealing a 920 bp of transcribed *MKK2* RNA in  
844 triggered events from ExII to ExV. The  $\beta$ -actin was used as the control in all RT-PCR assays; WT  
845 was positive. **(f)** RT-PCR revealed that BleoR CDS was adequately inserted in the target region  
846 with amplifying 413 bp of transcribed RNA in the recovered events. The  *$\beta$ -actin* was used as the  
847 control in all RT-PCR assays; BleoR protein extracted from pDDT plasmid was used as the  
848 positive control. WT was used as the negative control. **(g)** Schematic of probing BleoR in edited  
849 events and WT as the control using Southern blotting. **(h)** Southern blot proved that *BleoR* CDS

850 was integrated into the precise recombinant genome. Digested pDDT plasmid was used as the  
851 positive control.

852 **Figure 4:** The 2D kernel density plot of TaqMan real-time PCR fluorescent intensities and  
853 HDR efficiency percentage. **(a)** The TaqMan real-time PCR assay designing to detect HDR  
854 happened, and evaluation included FAM1 and FAM2 DNA binding probes. **(b)** Strategy to  
855 classify edited events. **(c)** Experiment I revealed no density for the edited events. **(d)** The  
856 density plot of FAM1 and -2 intensities resulted from experiment II revealed an expansion in  
857 edited events against partial, mutant, and wild-types. **(e)** The density plot of FAM1 and -2  $\Delta\Delta Ct$   
858 resulted from experiment III revealed an increased intensity of partial FAM1 events. **(f)**  
859 Experiment IV revealed a remarkable increase of edited events signals in confronting with three  
860 earlier experiments. **(g)** The Density plot of experiment V revealed a significant increase of  
861 FAM1 and -2 intensities in edited events compared to the earlier experiments and a significant  
862 decrease in intensities in WT and mutated events. All samples were analyzed in quadruplicate.  
863 **(h)** Diamond box and whisker plot revealed the identification of all FAM signals visualized in the  
864 experiments and showed more signals remarkably measured in ExV than ExI, II, and-III; Error  
865 bars represent SE; Asterisks represent p-value as  $*\leq 0.05$ ,  $**\leq 0.01$ , and  $***\leq 0.001$ . **(i)** The bar  
866 plot represents the HDR efficiency in different experiments; The overlap data are shown as bin  
867 bars, and the standard distribution curves are added. HDR efficiency plot revealed that *XRCC4*  
868 deficiency (ExV) led to HDR happening significantly more than the fusion of CtIP (ExII), MRE11  
869 (ExIII), and CtIP+MRE11 (ExV). Also, ExIV meaningfully revealed more HDR happening than ExII  
870 and -III.; Error bars represent SE; Asterisks represent p-value as  $**\leq 0.01$ ,  $***\leq 0.001$ , and  
871  $****\leq 0.0001$ ; Triplicate technical repeats were considered for each sample.

872 **Figure 5:** Violin plots reveal the *BleoR* and *MKK2* expression and the success happening  
873 HDR via different experiments. **(a-e)** The differences between *BleoR* and *MKK2* expression.  
874 Three technical repeats were used for each event in this assay; Dash lines present quartiles;  
875 Solid lines present median. **(f)** Heat-map to show the effect of efficient HDR on the expression  
876 of NHEJ and HDR factors. Overexpression *CtIP* and/or *MRE11* caused to enhance the expression  
877 of *BRCA1*, *Rad50*, and *Rad51* and to demote the expression of *Lig4* and *XRCC4*. The highest  
878 expression of the HDR factors visualized in ExV means that *XRCC4* deficiency decreased the

879 expression of NHEJ factor *Lig4* and intensified HDR efficiency. Triplicate technical repeats were  
880 considered for each sample.

881 **Figure 6:** Polymorphisms analysis. **(a)** Analyses of distributed indel nucleotides  
882 happened on 5' and 3' homology arms and knocked in fragments throughout experiment  
883 events. **(b)** Diamond box and whiskers for the mean comparisons of happened indel nucleotides  
884 through experiment events. The exact numbers of indels are presented via the punching  
885 column bars on the top-right corner. **(c)** Identification of the happened polymorphisms in  
886 homology arms through the experiments. Box and Whisker plot revealed that most  
887 polymorphisms happened in homology arms by ExI, and it was significantly more than those in  
888 ExV and -IV; Asterisks represent p-value as  $*\leq 0.05$ ; Error bars represent SE. **(d)** Stacked column  
889 plot of total polymorphisms happened in DDT integration into the poplar genome. Insertions  
890 and deletions were occurred much more than the other types. SNP and substitutions were  
891 occurred less than the other types. Whisker and standard distribution curves exposed that the  
892 total polymorphisms caused by *XRCC4* deficiency were less than the other experiments.

893 **Figure 7:** Radar diagrams of *MKK2* expressions, stem lengths, and -diameters from WT  
894 and survived recovered events after NaCl treatment. No significant differences  
895 in *MKK2* expressions and phenotypic changes before and after salt stress between WT and  
896 survived recovered events confirmed the proper HDR.

## 897 **Supplementary data**

898 **Supplementary 1:** Schematic of pgRNA, DDT, and pDDT. **(a)** pgRNA included the *MKK2*  
899 target seed and Cas9. **(b)** pDDT included DDT ligated into pRGEB31 by restriction enzyme  
900 cloning method.

901 **Supplementary 2:** Schematic construction of DDT and pDDT fragments, primers, and  
902 oligos.

903 **Supplementary 3:** Schematic construction of CtIP, MRE11, CtIP+MRE11, and *XRCC4*  
904 cassette primers and oligos.

905 **Supplementary 4:** Schematic construction of cassettes (CtIP and MR) and vectors  
906 (pgCtIP and pgMR) and their primers.

907           **Supplementary 5** : Schematics of constructed cassettes and plasmids. **(a)** pgCtIP plasmid  
908 including CtIP cassette. **(b)** pgMR plasmid including MR cassette. **(c)** pgCtMR plasmid including  
909 CtMR cassette. **(d)** pggCtMR plasmid including XRCC4 cassette.

910           **Supplementary 6**: Schematic construction of cassettes (CtMR, XRCC4) and vectors  
911 (pgCtMR and pggCtMR) and their primers.

912           **Supplementary 7**: Alignment of events involved in experiment I.

913           **Supplementary 8**: Alignment of events involved in experiment II.

914           **Supplementary 9**: Alignment of events involved in experiment III.

915           **Supplementary 10**: Alignment of events involved in experiment IV.

916           **Supplementary 11**: Alignment of events involved in experiment V.

917           **Supplementary 12**: Schematic of TaqMan real-time PCR FAM and VIC target assays in  
918 this study. Yellow rectangles exhibited CDS.

919           **Supplementary 13**: Box-and-whisker (Min-Max) plots of one-dimensional FAM delta-  
920 delta Ct signals in designed experiments. All signals were calculated as quadruplicates.

921           **Supplementary 14**: Schematics of sequence analyzing of triggered events from different  
922 experiments. **(a)** Sequence analysis of triggered events included in EXII reveals one recovered  
923 event. **(b)** Sequence analysis of triggered events included in EXIII reveals one recovered event.  
924 **(c)** Sequence analysis of triggered events included in EXIV reveals four recovered events. **(d)**  
925 Sequence analysis of triggered events included in EXV reveals 12 recovered events.

926           **Supplementary 15**: The raw data of real-time PCR evaluates the percentage of delta-  
927 delta Ct mean from *BleoR* in all experiments. **(a)** Delta-delta Ct mean of *BleoR* expression from  
928 grown buds. Each sample was investigated with three technical repeats. **(b)** Descriptive statistic  
929 table of raw data calculated by ANOVA-One way.

930           **Supplementary 16**: Column plots of the expression of integrated *BleoR* and new  
931 recombinant *MKK2* genes via different designed experiments. Three technical repeats were  
932 used for each event in this assay; Error bars represent SD; WT and pDDT were used to  
933 control *MKK2* and *BleoR* expression, respectively.

934           **Supplementary 17**: Chromatogram alignments of events included in experiment V.



935 **Supplementary Table**

936 **Supplementary Table 1:** CRISPR sites located on 3' region of *MKK2*. The yellow highlight  
937 reveals the selected CRISPR target in this study.

938 **Supplementary Table 2:** Oligos and primers used in this study.

939 **Supplementary Table 3:** All polymorphisms detected in homology arms happened by  
940 HDR through experiments.

941 **Supplementary Table 4:** Variant nucleotides happened from experiments.

942 **Supplementary Table 5:** The raw data of RT-qPCR of *MKK2* expressions and phenotypic  
943 analyzes in WT and survived recovered events before and after salt stress. All events were  
944 analyzed in triplicates for RT-qPCR.

945

946

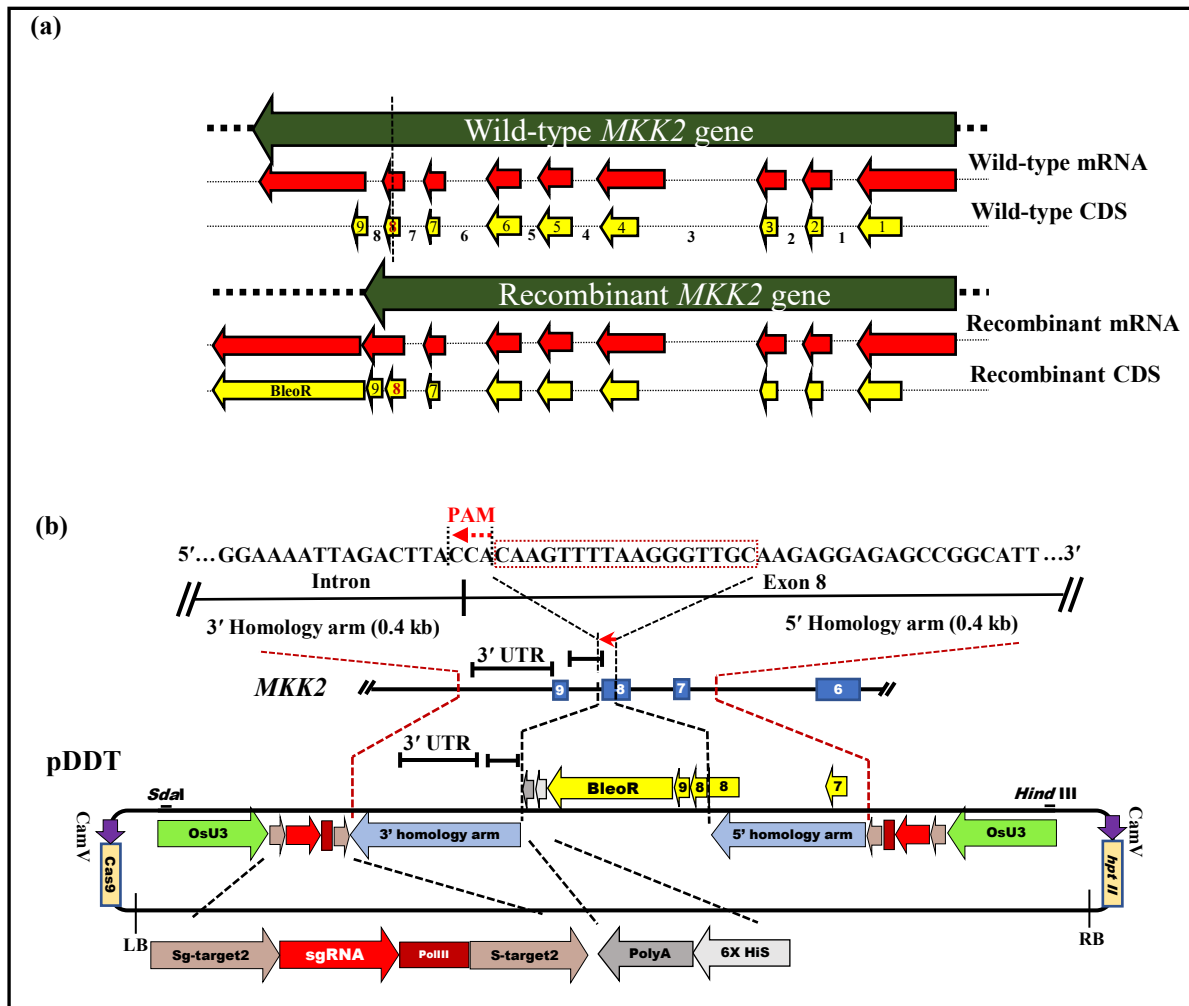

**Figure 1:** Schematics of *MKK2* locus before and after edition and integration of exogenous *BleoR* CDS into the poplar genome (a) Schematic of the purpose of this research to integrate exogenous *BleoR* into the poplar genome. Dash line reveals the target site. (b) Protospacer Adjacent Motif (PAM) was detected at the end of exon 8 to lead Cas9. 400 bp sequences from both sides of the CRISPR target were selected for HDR in this study. The 5' homology arm included part sequences of the intron between exon 6 and -7, exon 7, intron sequences between exon 7 and -8, and a part of exon 8. The 3' homology arm included intron sequences between exon 8 and -9 and 3' UTR of the *MKK2* locus up to 400 bp. Designed DDT included remained sequences of exon 8, exon 9, *BleoR* CDS, 6xHis, and PolyA sequences flanked by the 3'- and 5' homology arms. We added two special targets besides DDT. The DDT was then ligated into the pRGEB31 vector to form pDDT.

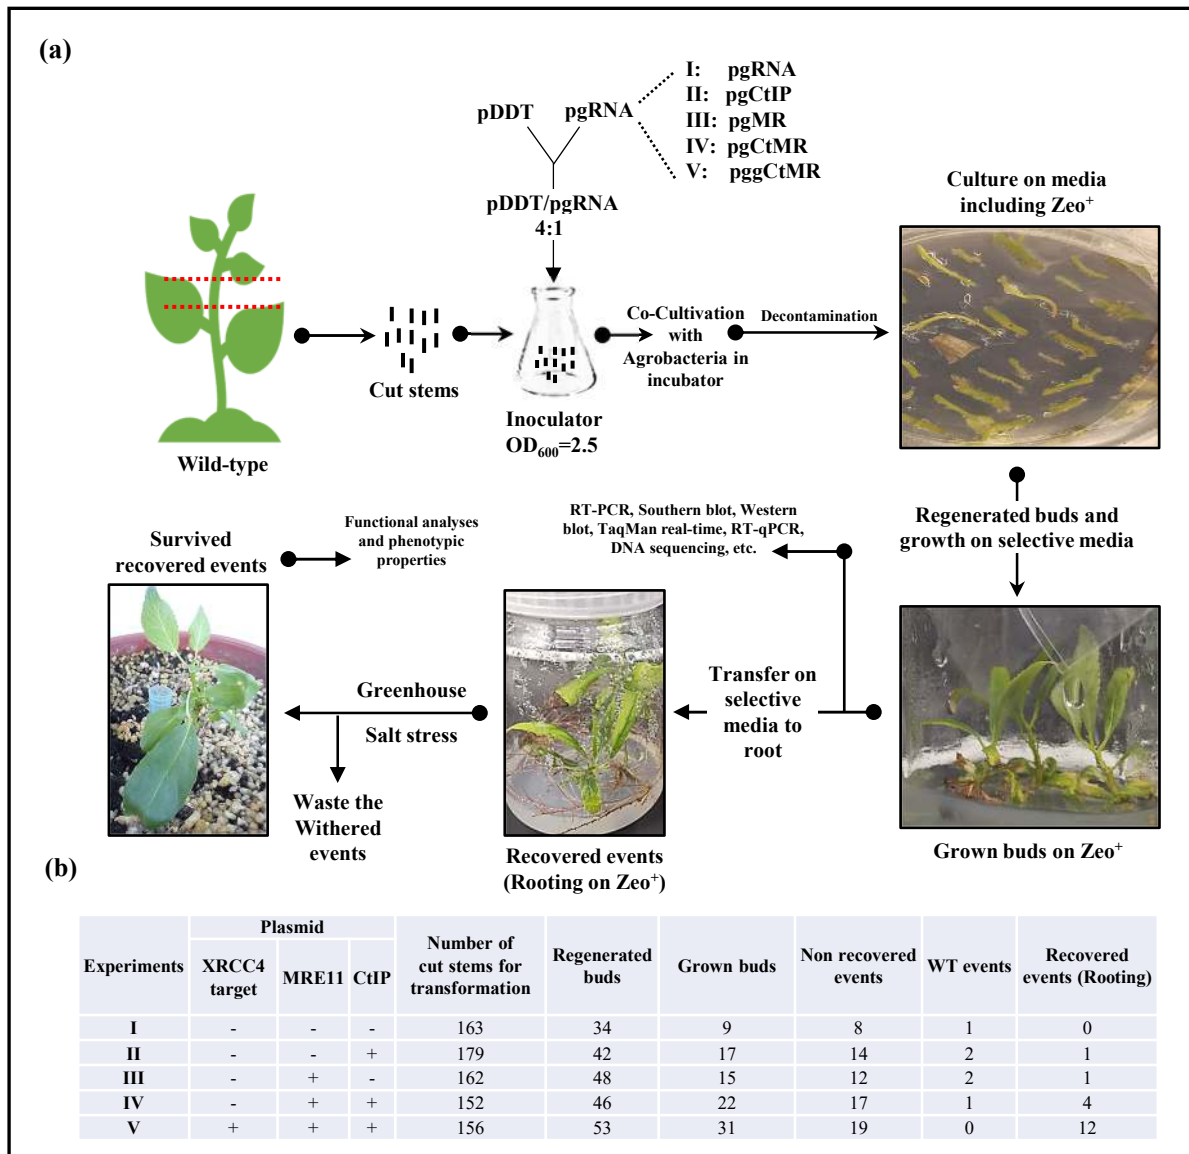

**Figure 2:** The transformation strategy and designing of experiments. **(a)** pDDT and pgRNA were mixed 4:1 and introduced to the *Agrobacterium tumefaciens* to form inoculator suspension. We condensed inoculator up to  $OD_{600}=2.5$  and then dipped all cut off stems. The putatively edited events were regenerated on Zeocin. We allowed putative edited events to bud. The grown buds were then transferred on selective rooting media and allowed to be recovered. Recovered events were then planted on soil and following two weeks of acclimation introduced by salt stress **(b)** Designed experiments for this study including (I) No HDR factors, (II) overloaded CtIP, (III) overloaded MRE11, (IV) Overloaded CtIP+MRE11, and (V) Overloaded CtIP+MRE11 with *XRCC4* deficiency.

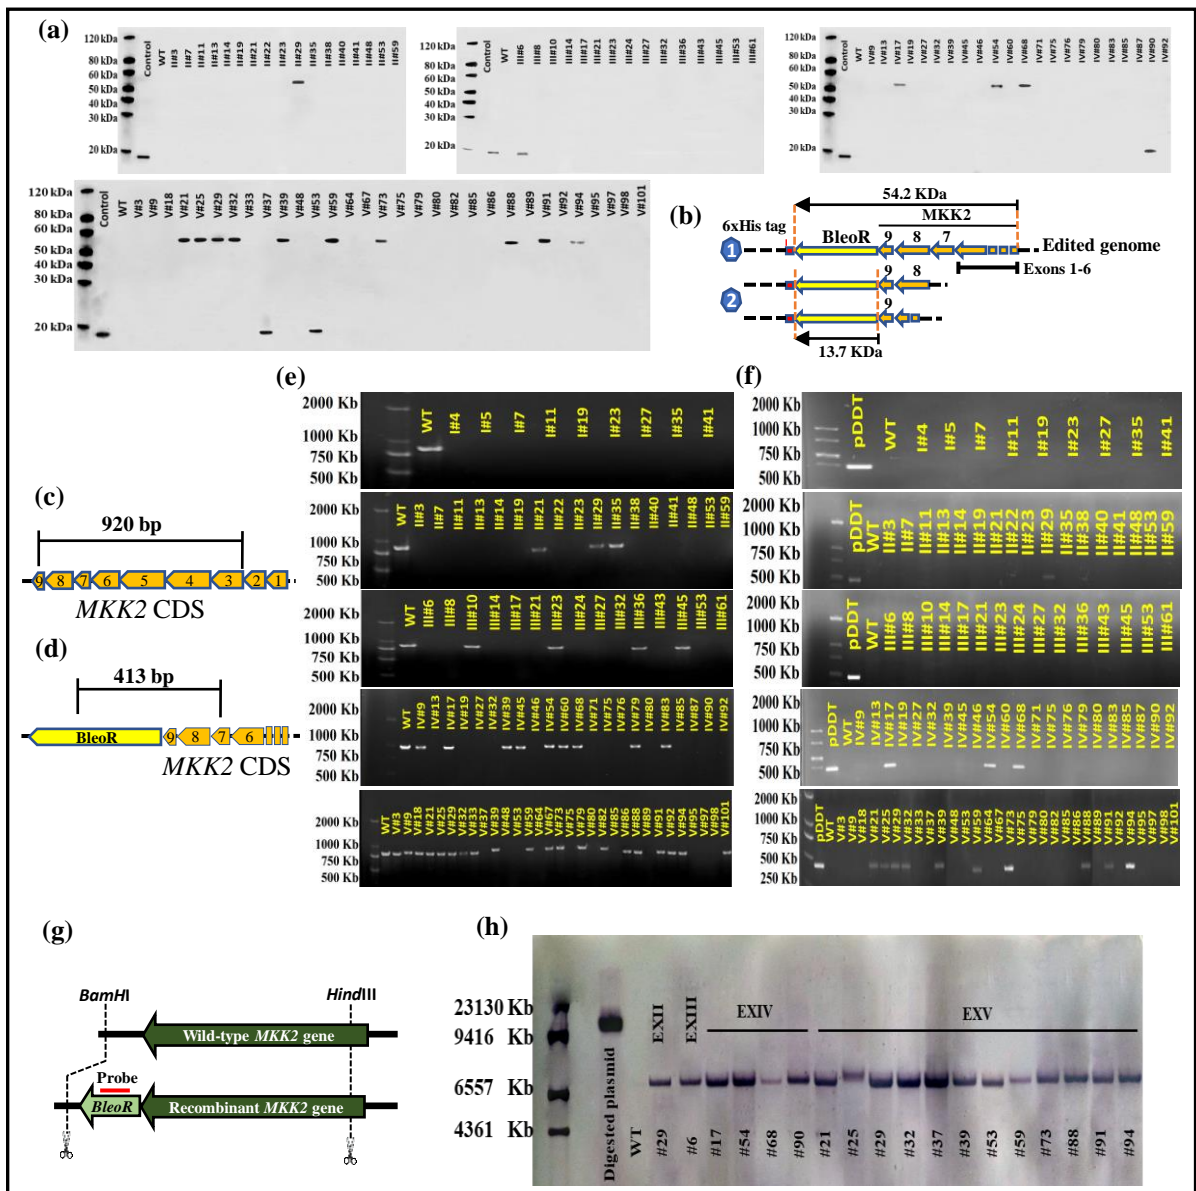

**Figure 3:** Western blotting to reveal the fused 6xHis tag with BleoR integration into the poplar genome. **(a)** Different experiments exhibited different quantities of 6xHis tag fusion. **(b)** Schematic of fusion 6xHis tag with edited poplar genome triggered by different experiments. Shape 1 reveals successful fusion of BleoR and MKK2 with about 54 kDa. Shape 2 reveals an unsuccessful combination of mentioned proteins with about 14 kDa. **(c)** Schematic of right HDR happening caused to attach exon 8 and 9 in the edited genome. **(d)** Schematic of proper integration in edited genome caused to connect the BleoR to the C-terminal of MKK2. **(e)** RT-PCR exhibited the HDR in exon 8 and 9, revealing a 920 bp of transcribed MKK2 RNA in triggered events from ExII to ExV. The  $\beta$ -actin was used as the control in all RT-PCR assays; WT was positive. **(f)** RT-PCR revealed that BleoR CDS was adequately inserted in the target region with amplifying 413 bp of transcribed RNA in the recovered events. The  $\beta$ -actin was used as the control in all RT-PCR assays; BleoR protein extracted from pDDT plasmid was used as the positive control. WT was used as the negative control. **(g)** Schematic of probing BleoR in edited events and WT as the control using Southern blotting. **(h)** Southern blot proved that BleoR CDS was integrated into the precise recombinant genome. Digested pDDT plasmid was used as the positive control.

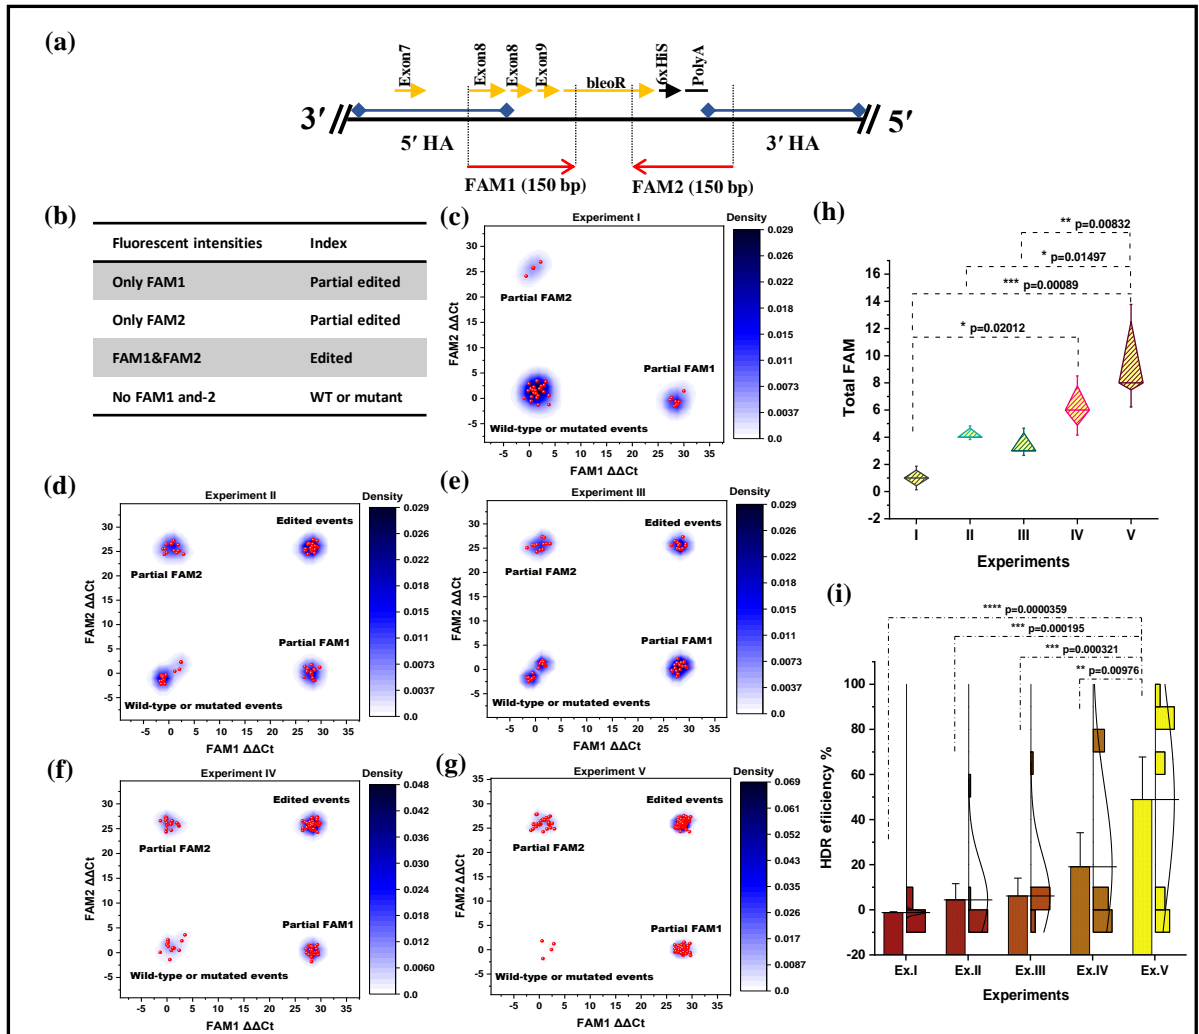

**Figure 4:** The 2D kernel density plot of TaqMan real-time PCR fluorescent intensities and HDR efficiency percentage. **(a)** The TaqMan real-time PCR assay designing to detect HDR happened, and evaluation included FAM1 and FAM2 DNA binding probes. **(b)** Strategy to classify edited events. **(c)** Experiment I revealed no density for the edited events. **(d)** The density plot of FAM1 and -2 intensities from experiment II revealed an expansion in edited events against partial, mutant, and wild-types. **(e)** The density plot of FAM1 and -2  $\Delta\Delta Ct$  resulted from experiment III revealed an increased intensity of partial FAM1 events. **(f)** Experiment IV revealed a remarkable increase of edited events signals in confronting with three earlier experiments. **(g)** The Density plot of experiment V revealed a significant increase of FAM1 and -2 intensities in edited events compared to the earlier experiments and a significant decrease in intensities in WT and mutated events. All samples were analyzed in quadruplicate. **(h)** Diamond box and whisker plot revealed the identification of all FAM signals visualized in the experiments and showed more signals remarkably measured in ExV than ExI, II, and-III; Error bars represent SE; Asterisks represent p-value as \* $\leq 0.05$ , \*\* $\leq 0.01$ , and \*\*\* $\leq 0.001$ . **(i)** The bar plot represents the HDR efficiency in different experiments; The overlap data are shown as bin bars, and the standard distribution curves are added. HDR efficiency plot revealed that *XRCC4* deficiency (ExV) led to HDR happening significantly more than the fusion of CtIP (ExII), MRE11 (ExIII), and CtIP+MRE11 (ExV). Also, ExIV meaningfully revealed more HDR happening than ExII and -III.; Error bars represent SE; Asterisks represent p-value as \*\* $\leq 0.01$ , \*\*\* $\leq 0.001$ , and \*\*\*\* $\leq 0.0001$ ; Triplicate technical repeats were considered for each sample.

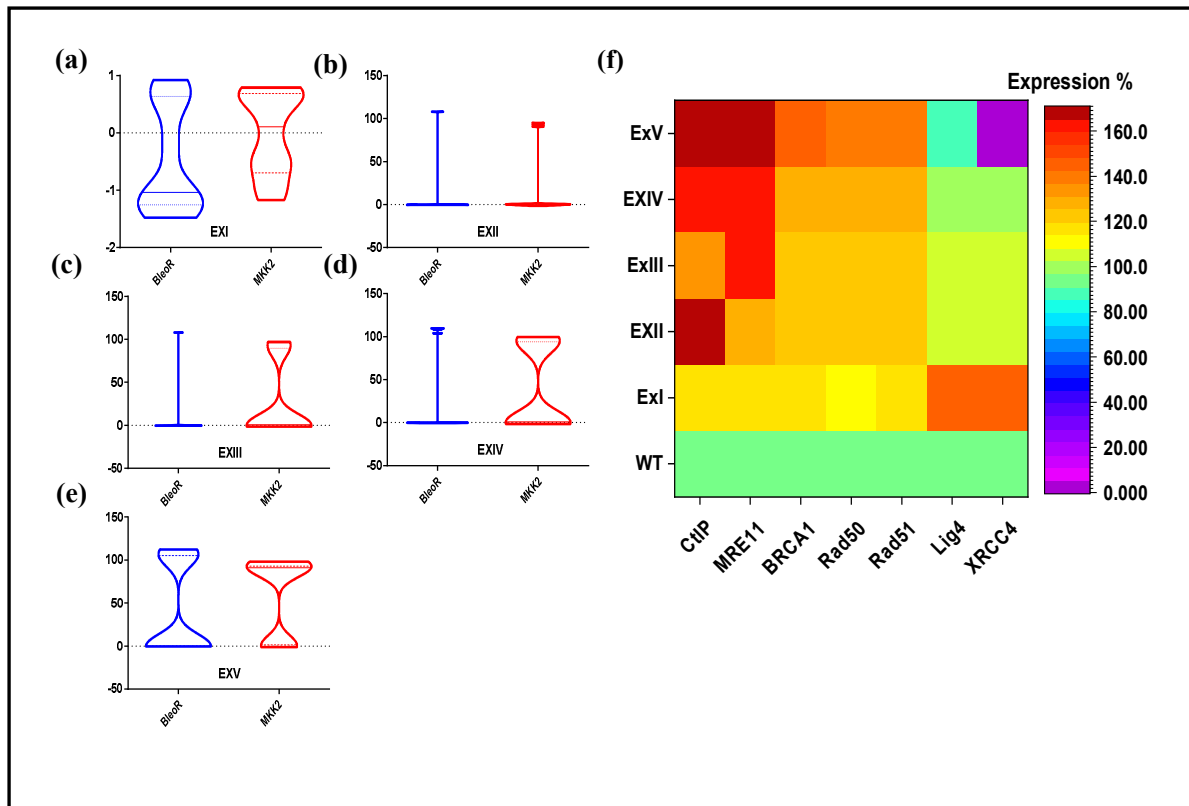

**Figure 5:** Violin plots reveal the *BleoR* and *MKK2* expression and the success happening HDR via different experiments. (a-e) The differences between *BleoR* and *MKK2* expression. Three technical repeats were used for each event in this assay; Dash lines present quartiles; Solid lines present median. (f) Heat-map to show the effect of efficient HDR on the expression of NHEJ and HDR factors. Overexpression *CtIP* and/or *MRE11* caused to enhance the expression of *BRCA1*, *Rad50*, and *Rad51* and to demote the expression of *Lig4* and *XRCC4*. The highest expression of the HDR factors visualized in ExV means that *XRCC4* deficiency decreased the expression of NHEJ factor *Lig4* and intensified HDR efficiency. Triplicate technical repeats were considered for each sample.



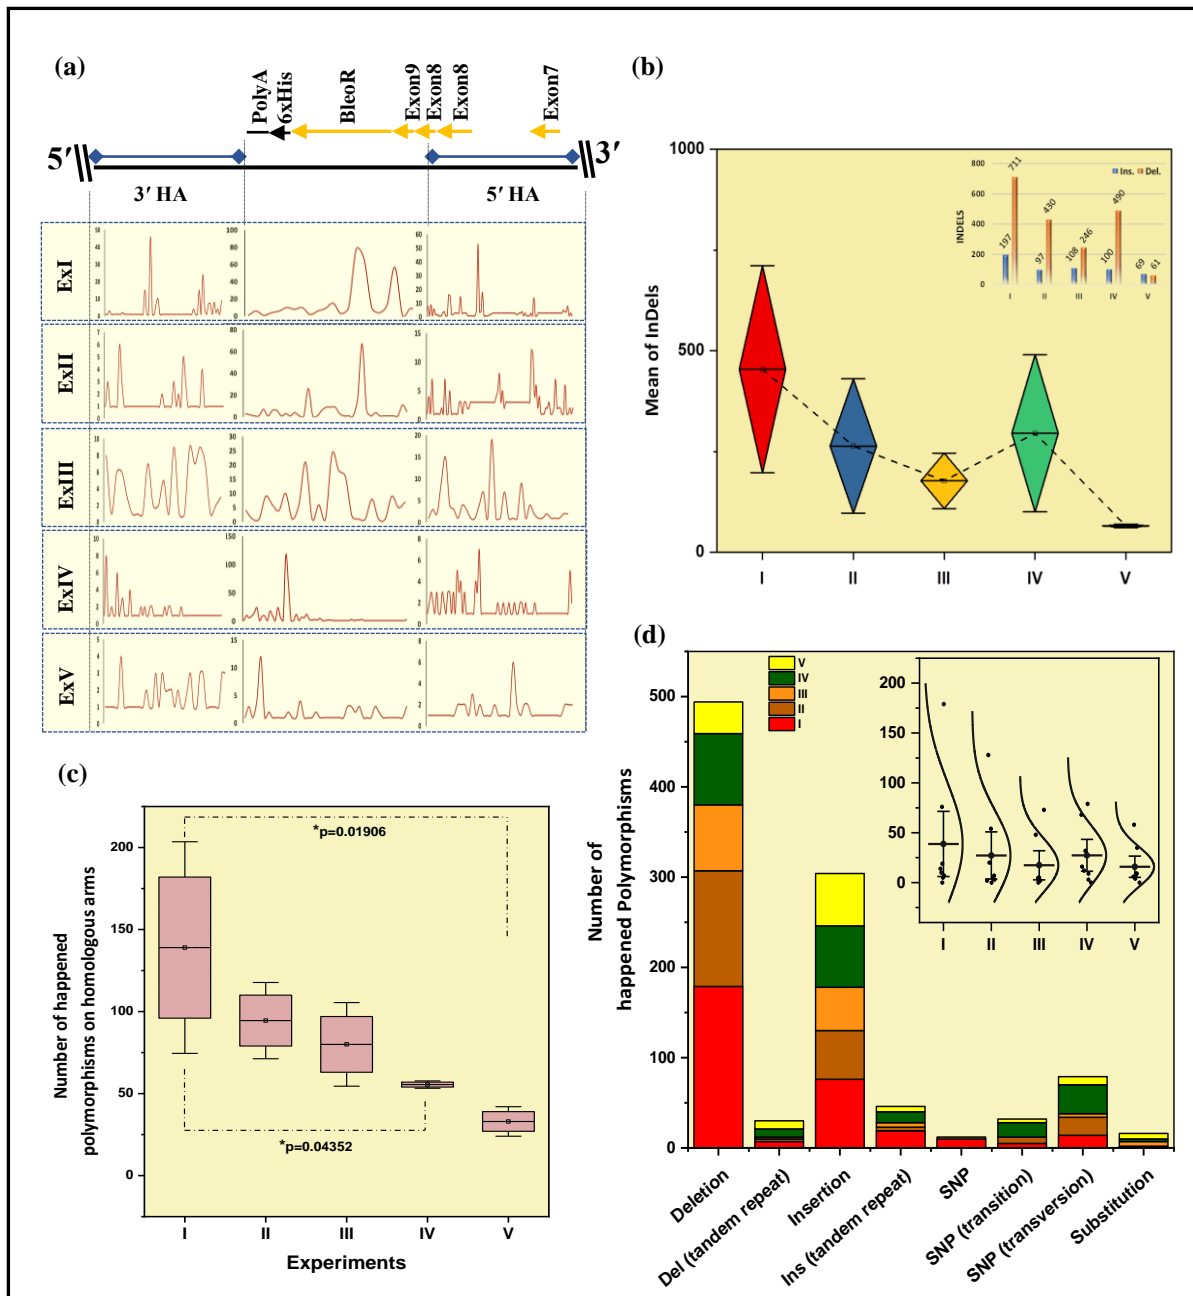

**Figure 6:** Polymorphisms analysis. **(a)** Analyses of distributed indel nucleotides happened on 5' and 3' homologous arms and knocked in fragments throughout experiment events. **(b)** Diamond box and whiskers for the mean comparisons of happened indel nucleotides through experiment events. The exact numbers of indels are presented via the punching column bars on the top-right corner. **(c)** Identification of the happened polymorphisms in homology arms through the experiments. Box and Whisker plot revealed that most polymorphisms happened in homology arms by ExI, and it was significantly more than those in ExV and -IV; Asterisks represent p-value as  $*\leq 0.05$ ; Error bars represent SE. **(d)** Stacked column plot of total polymorphisms happened in DDT integration into the poplar genome. Insertions and deletions were occurred much more than the other types. SNP and substitutions were occurred less than the other types. Whisker and standard distribution curves exposed that the total polymorphisms caused by XRCC4 deficiency were less than the other experiments.

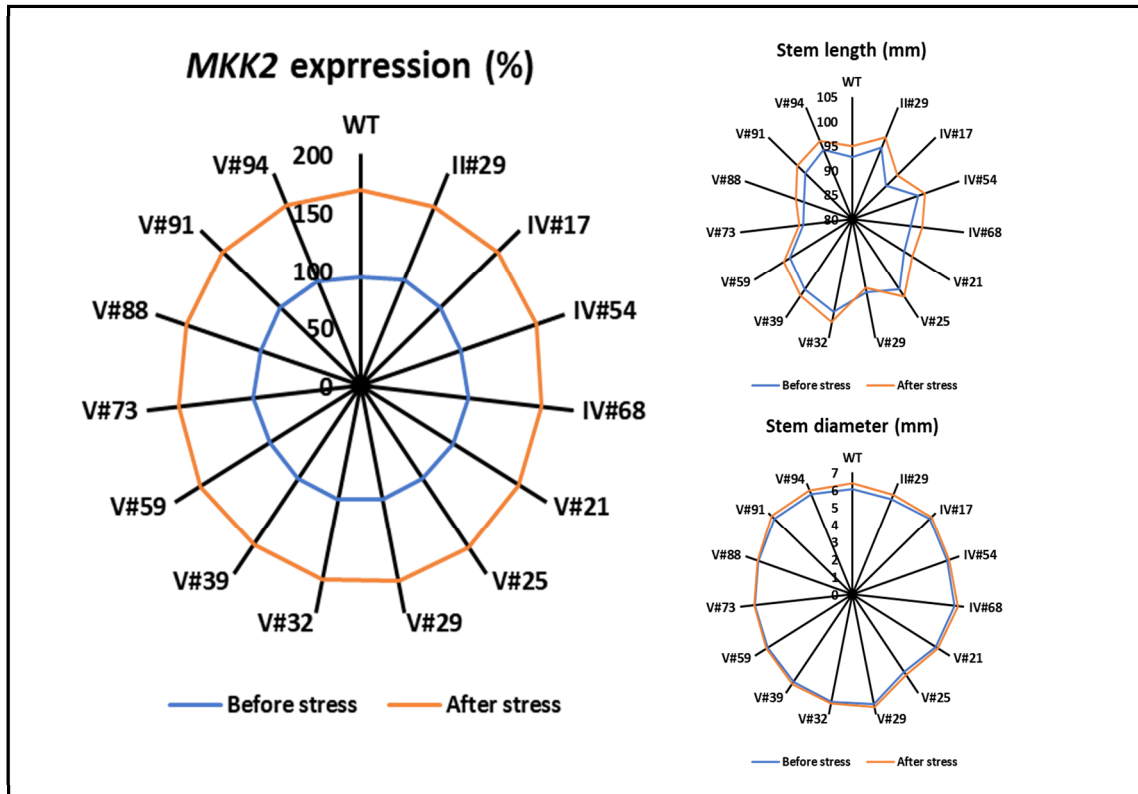

**Figure 7:** Radar diagrams of *MKK2* expressions, stem lengths, and -diameters from WT and survived recovered events after NaCl treatment. No significant differences in *MKK2* expressions and phenotypic changes before and after salt stress between WT and survived recovered events confirmed the proper HDR.
